# Supplementary material
Source: PubMed Central journal article supplement (PMC5937019)

## Supporting Information Part B

### Enantioselective Intermolecular Addition of Aliphatic Amines to Acyclic Dienes with a Pd—PHOX Catalyst

Nathan J. Adamson, Ethan Hull, Steven J. Malcolmson\*

*Department of Chemistry, Duke University  
Durham, North Carolina 27708 USA*

*E-mail: steven.malcolmson@duke.edu*

#### Table of Contents

|                                       |             |
|---------------------------------------|-------------|
| <b>I. Ligand Spectral Data.....</b>   | <b>S2B</b>  |
| <b>II. Product Spectral Data.....</b> | <b>S13B</b> |

## I. Ligand Spectral Data

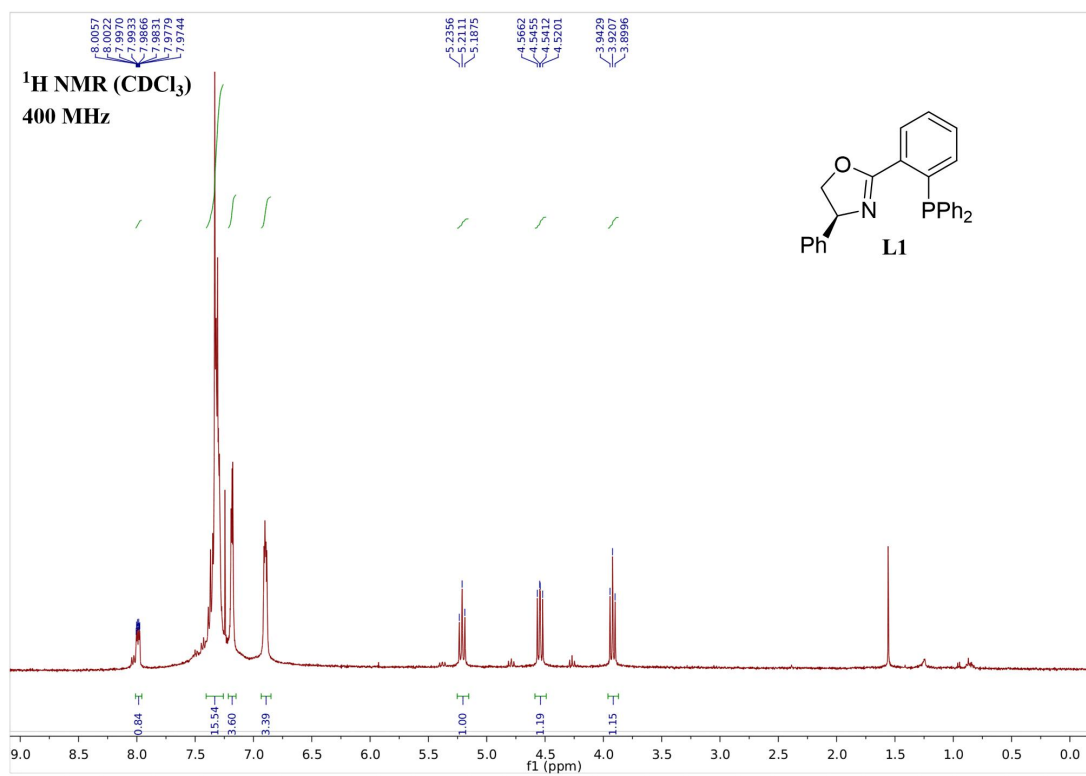

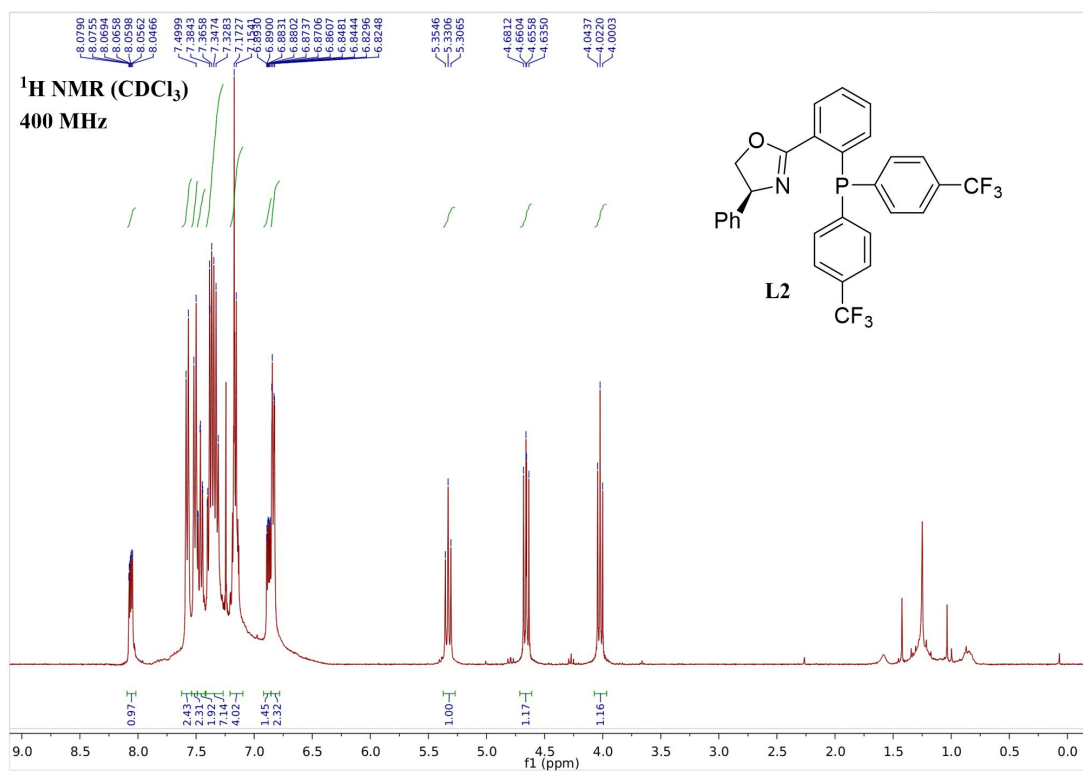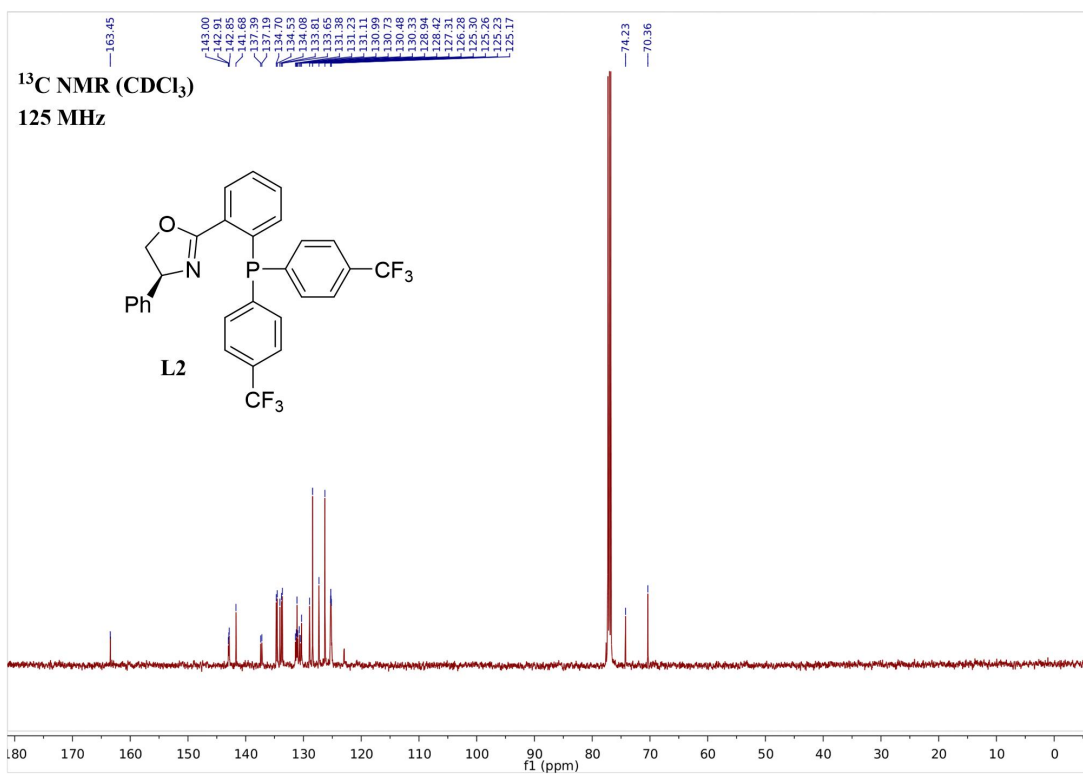

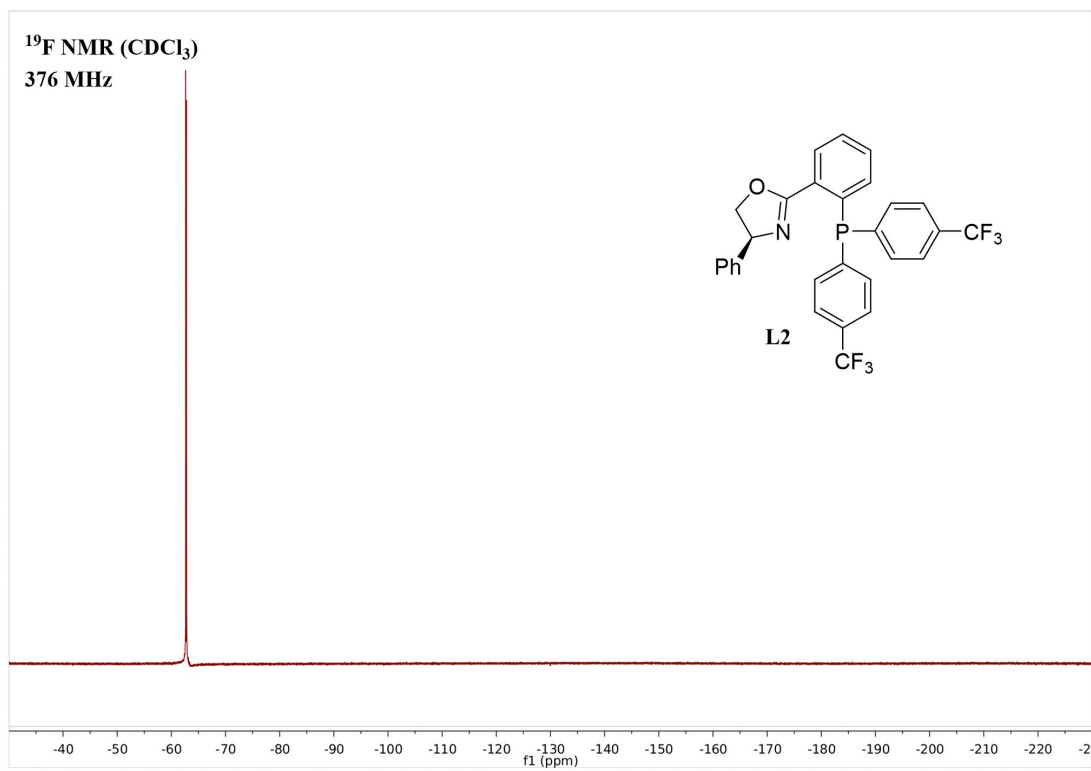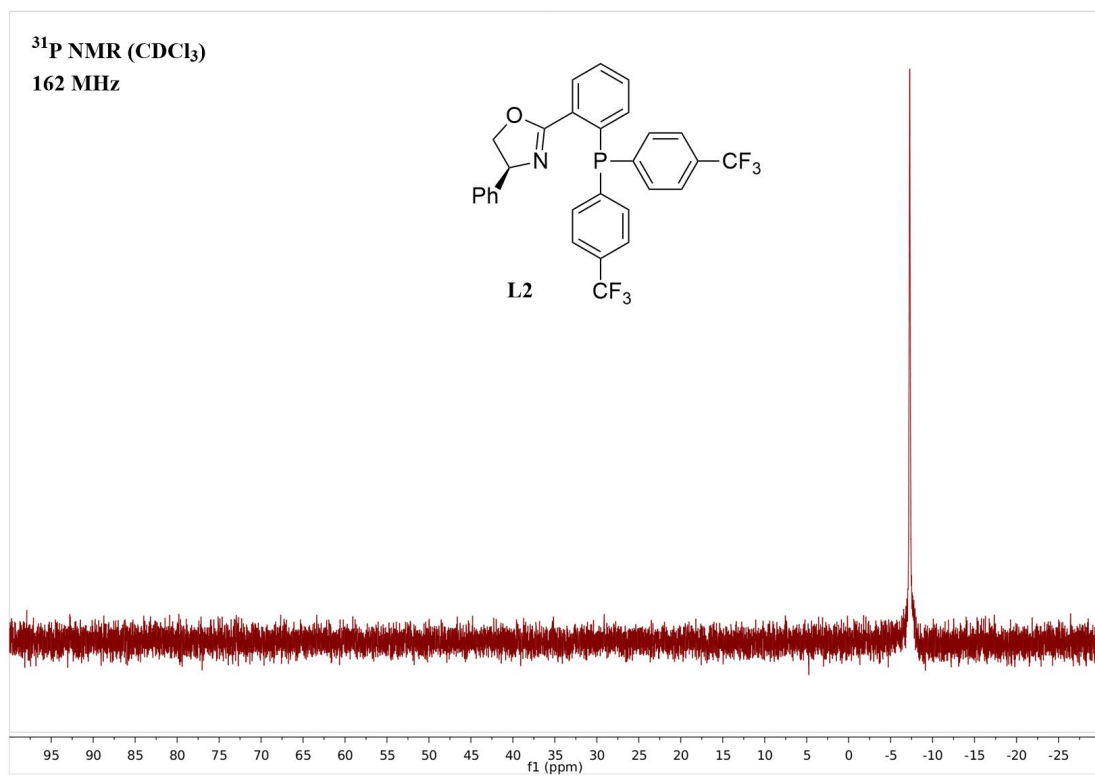

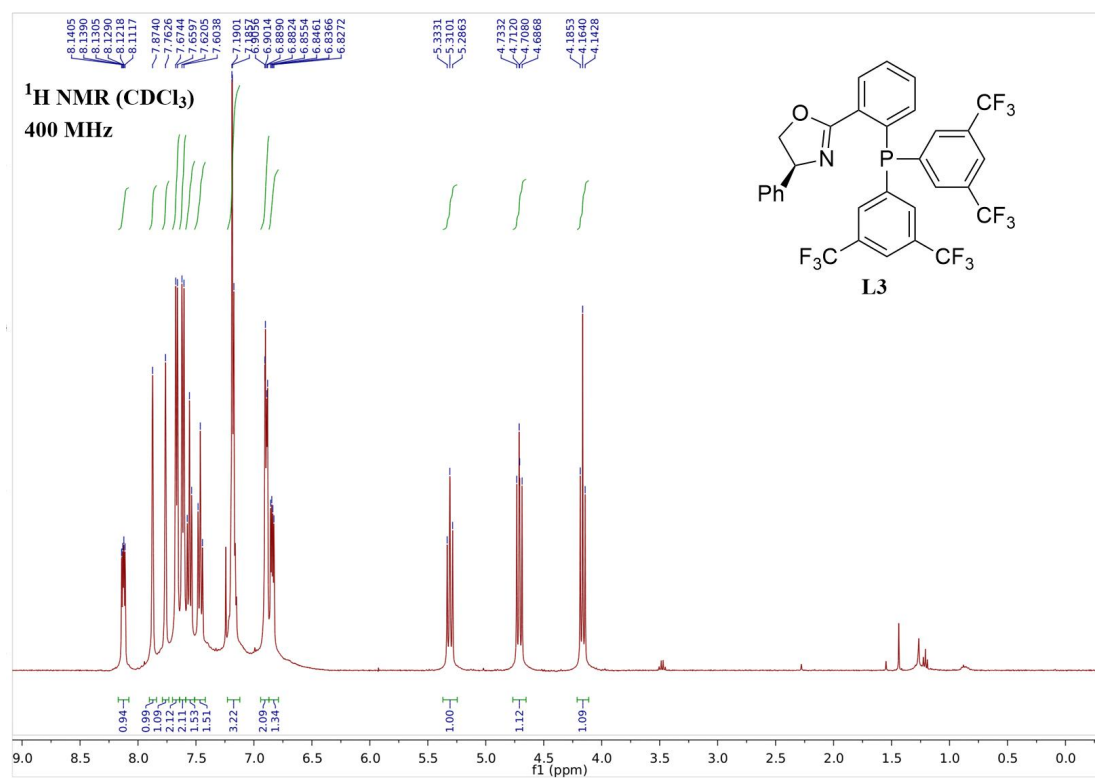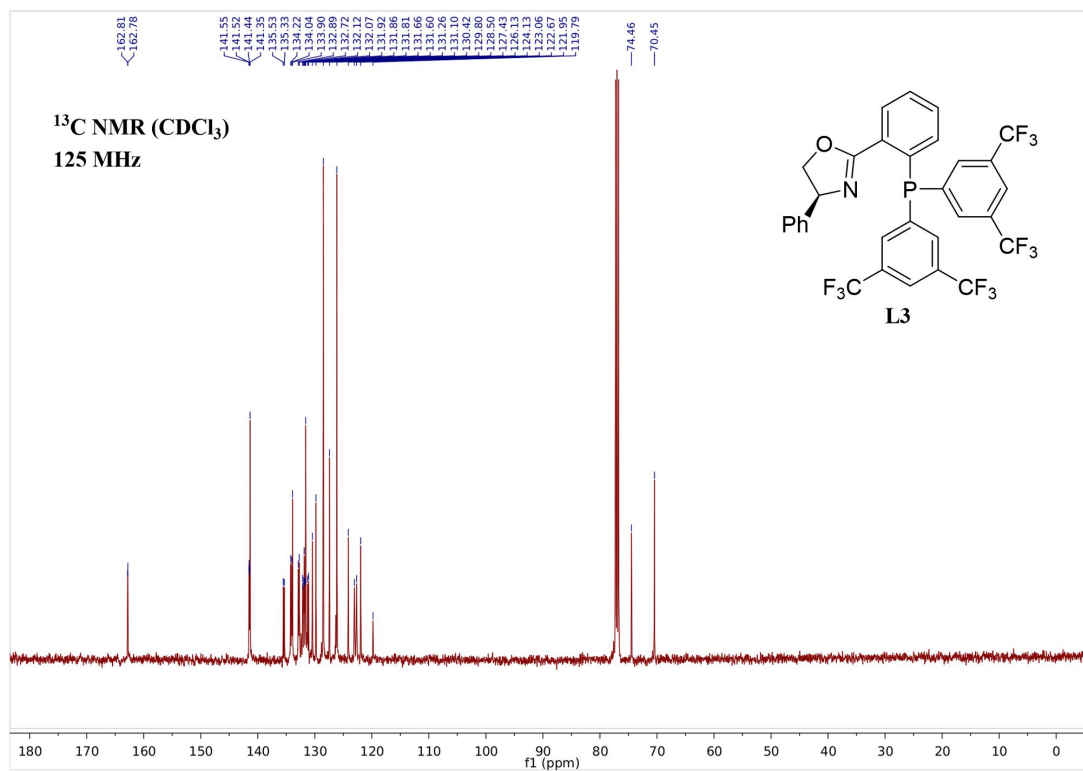

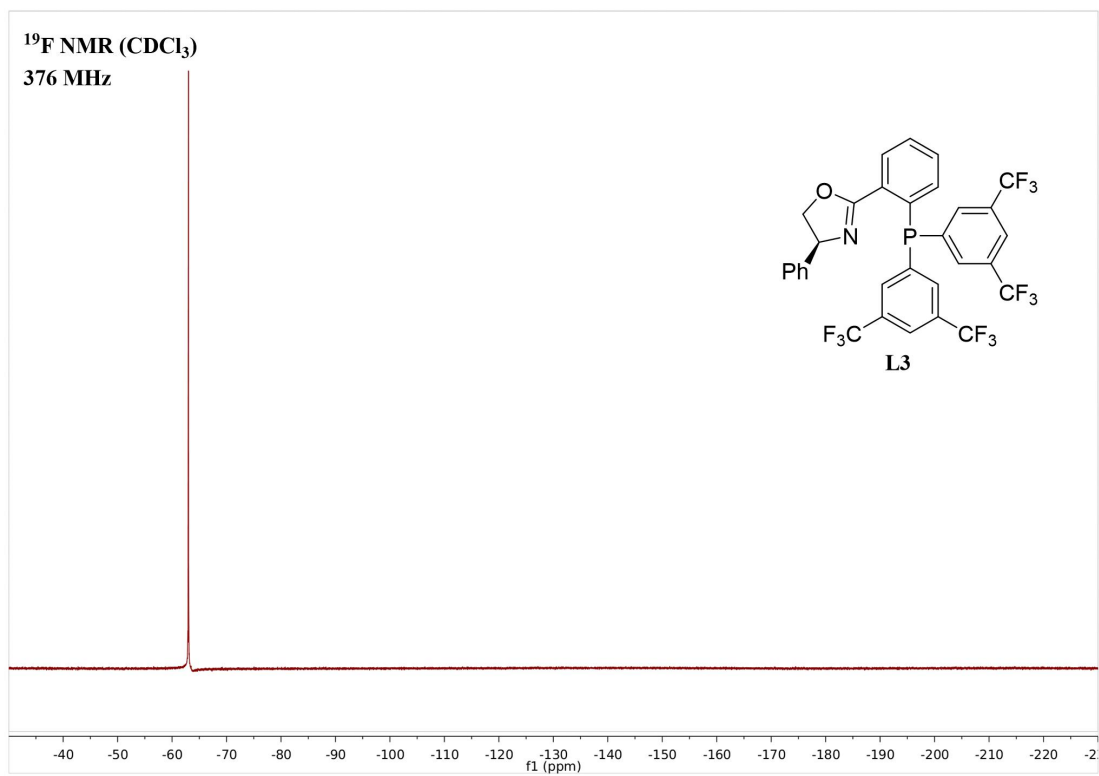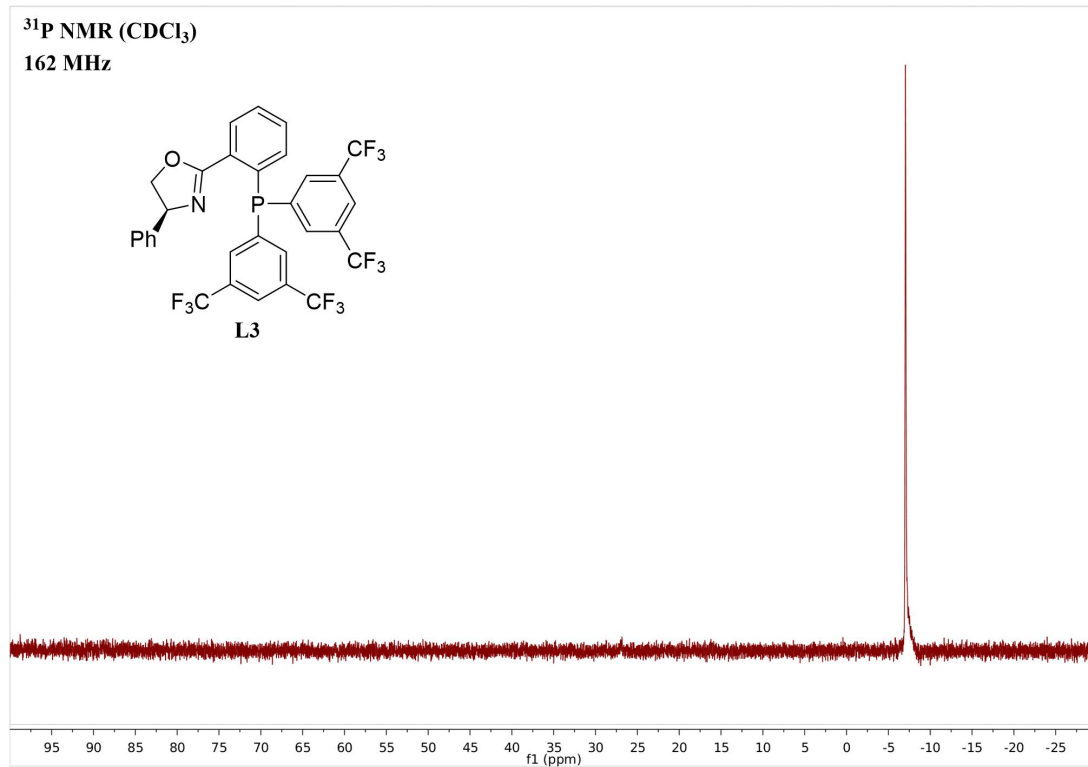

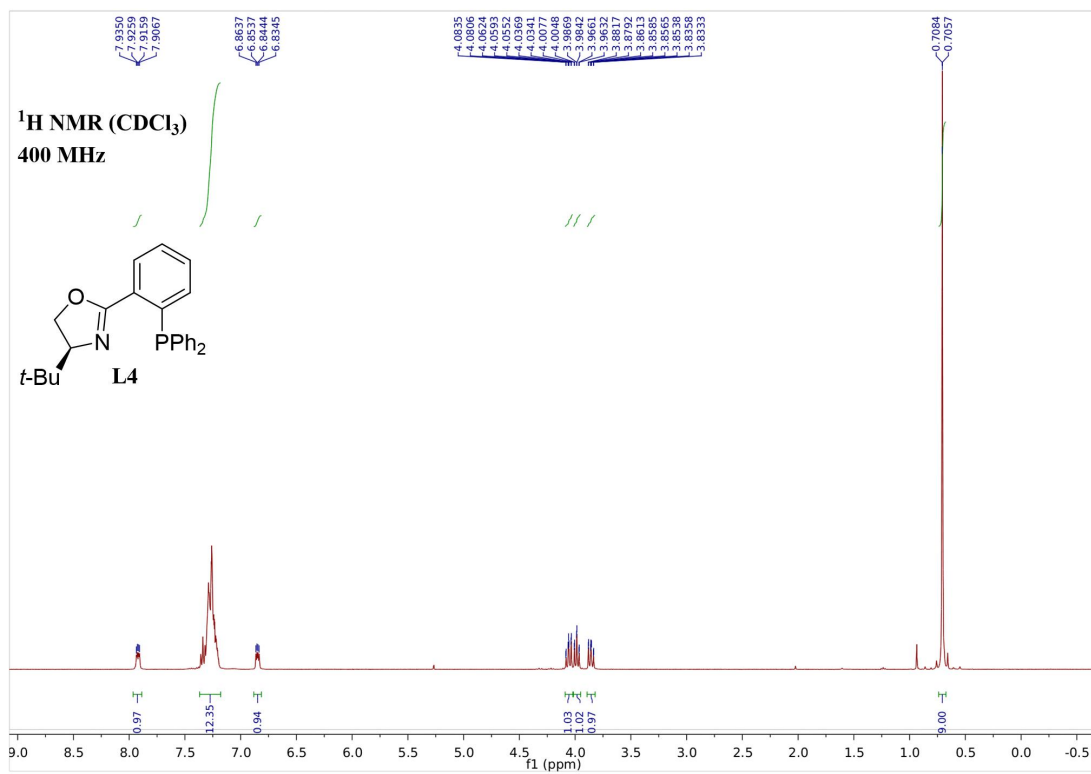

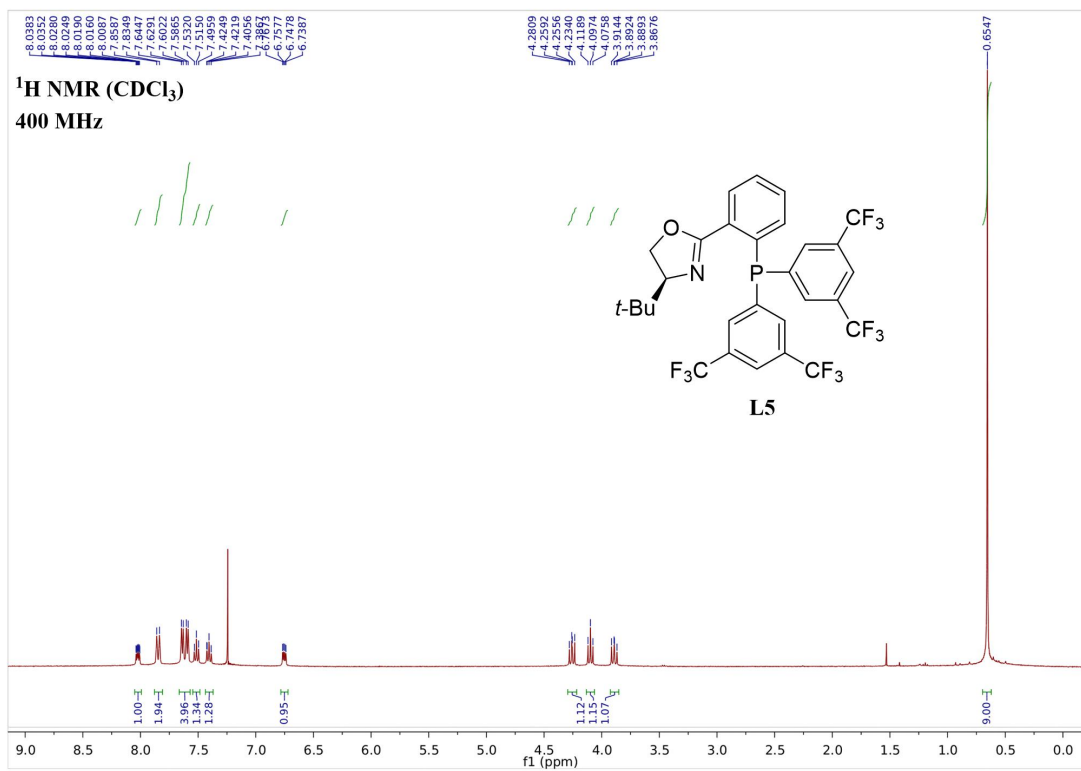



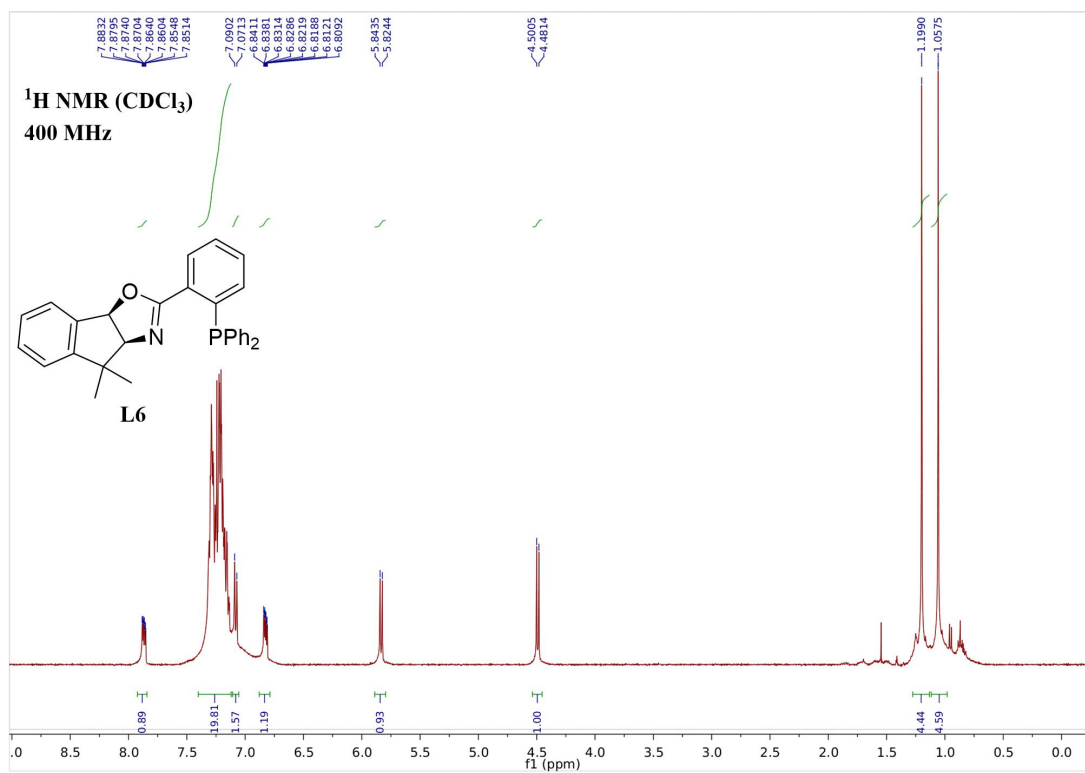

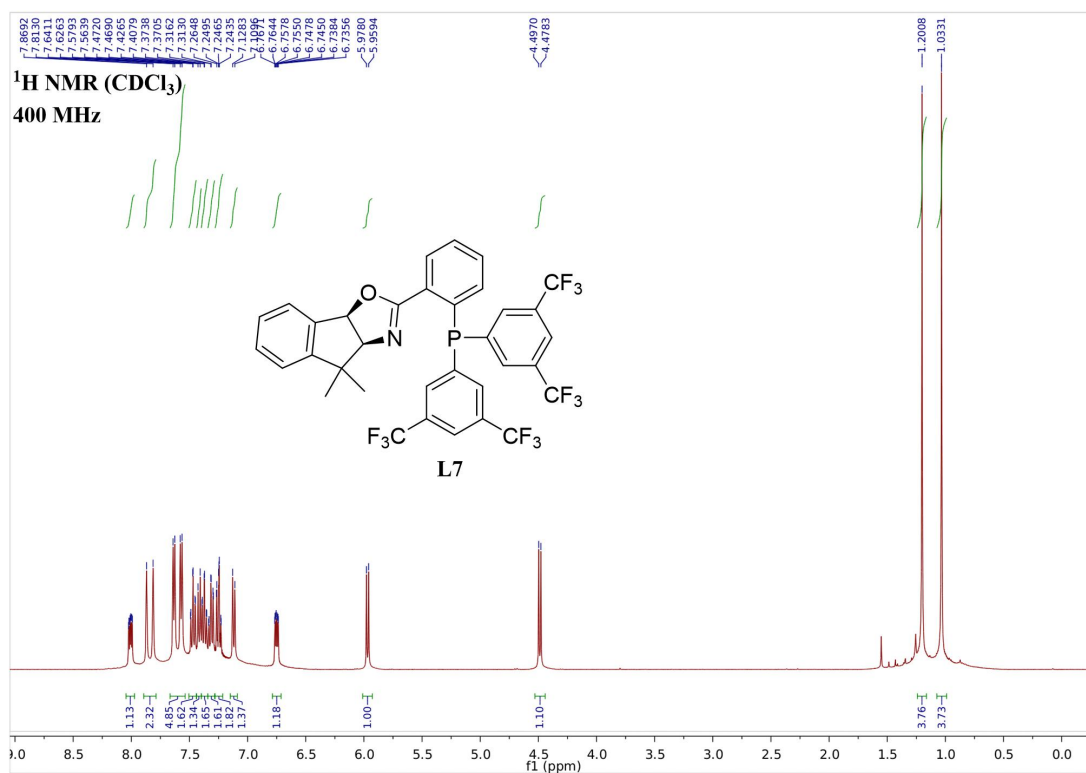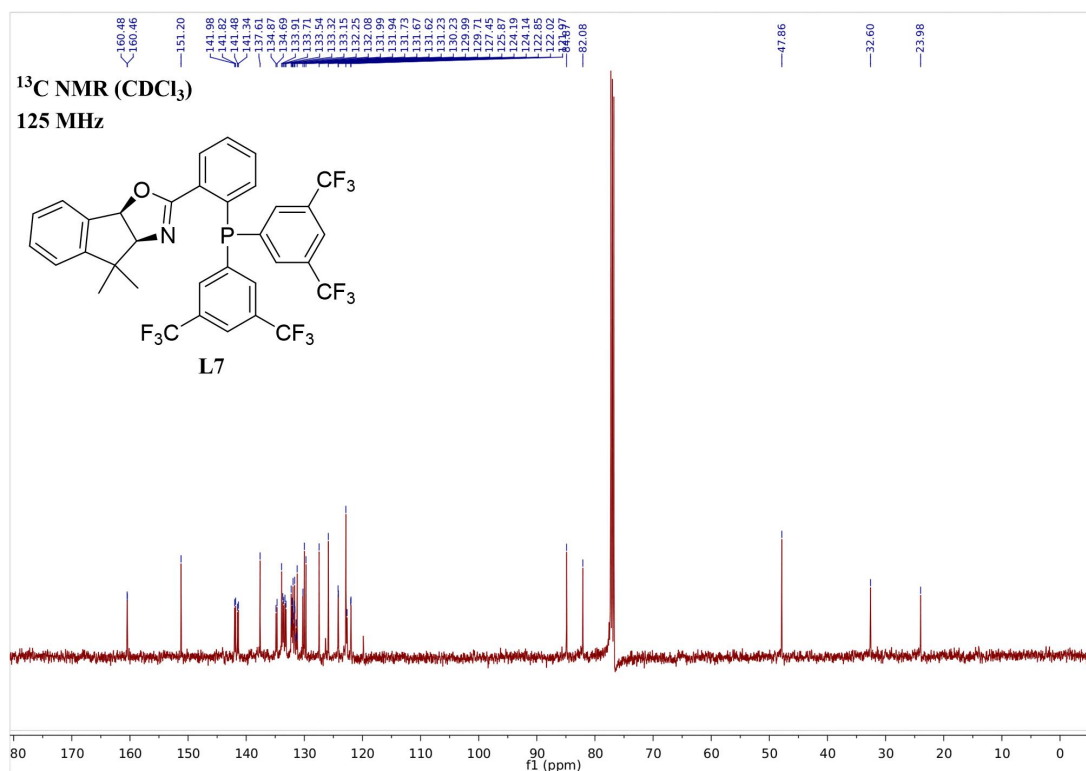

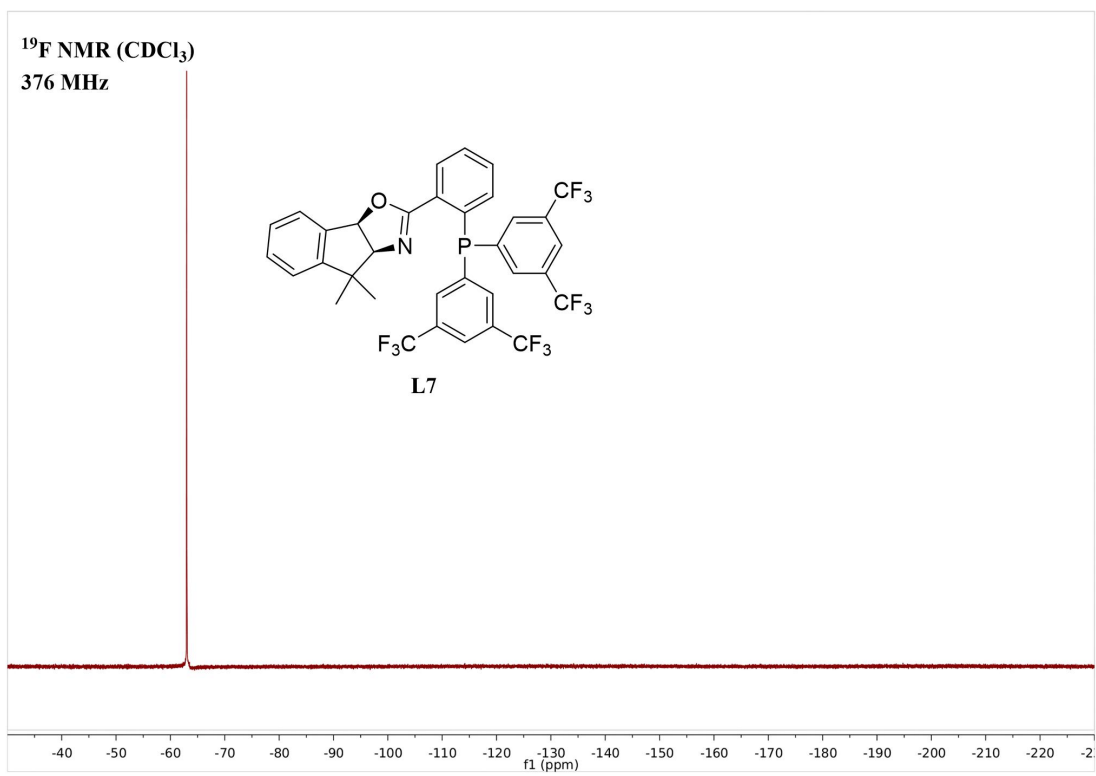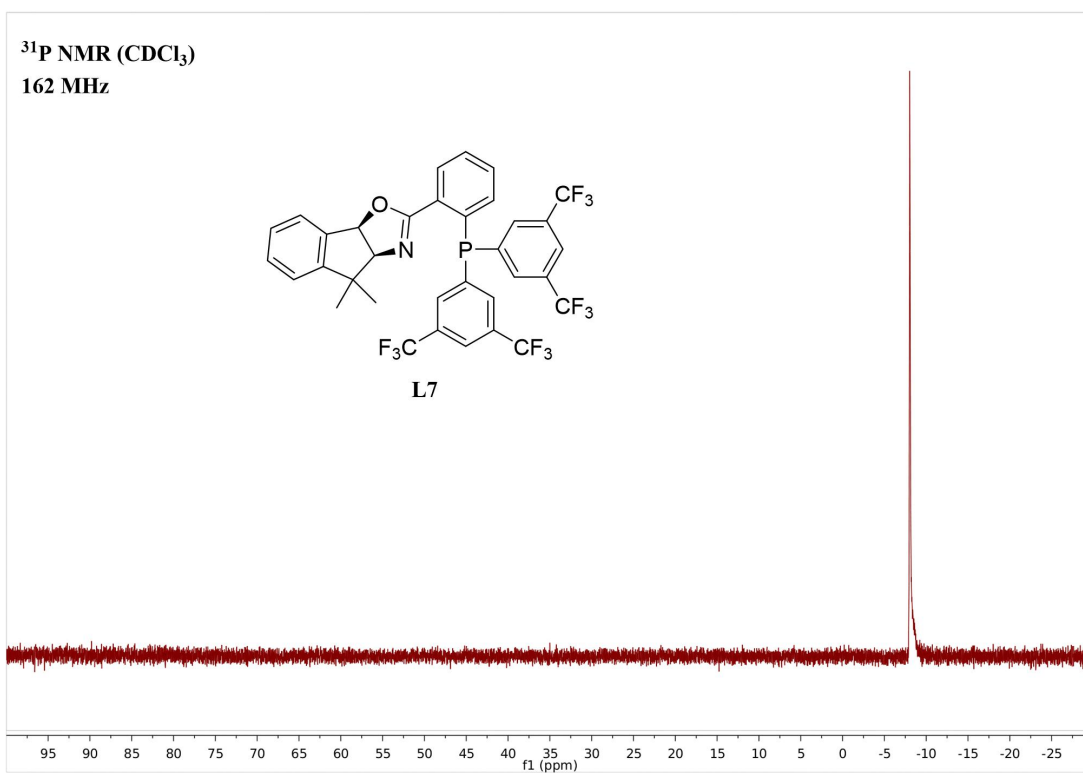

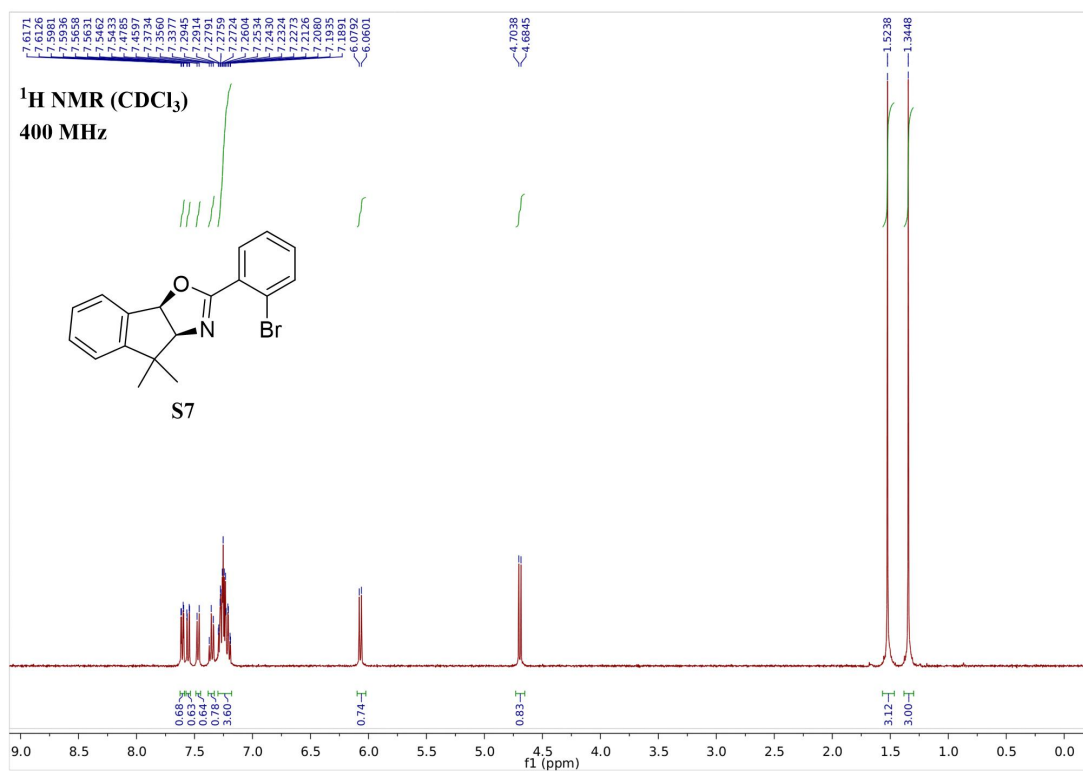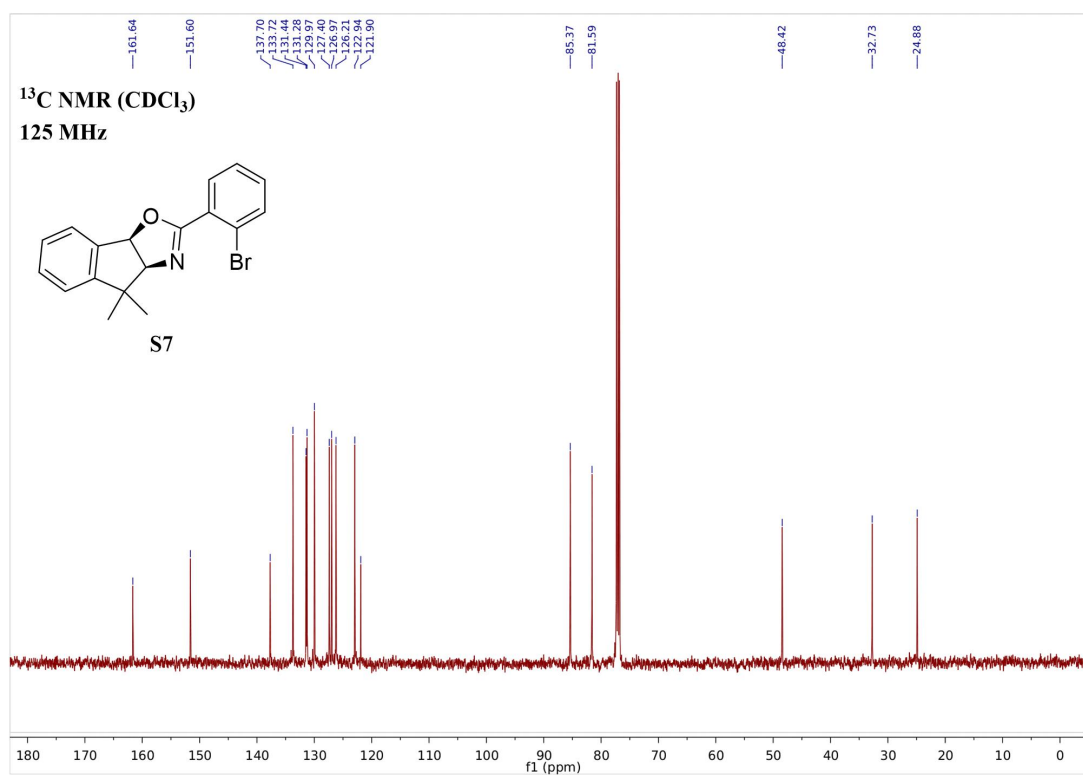

## II. Product Spectral Data

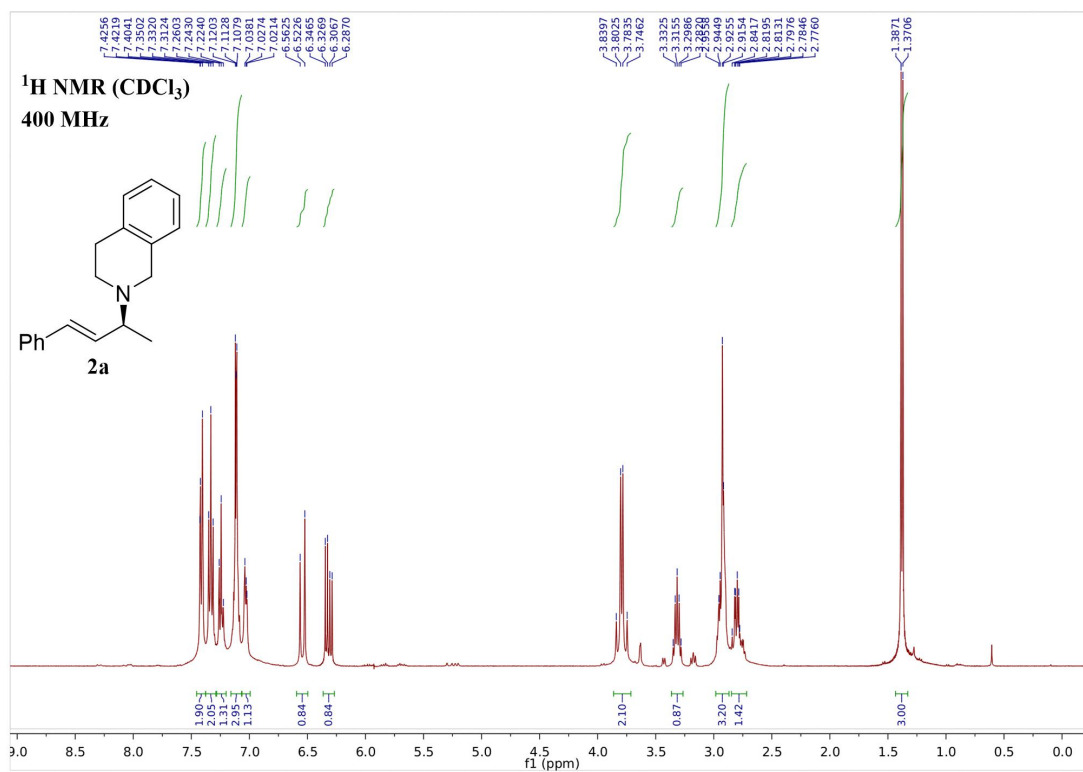

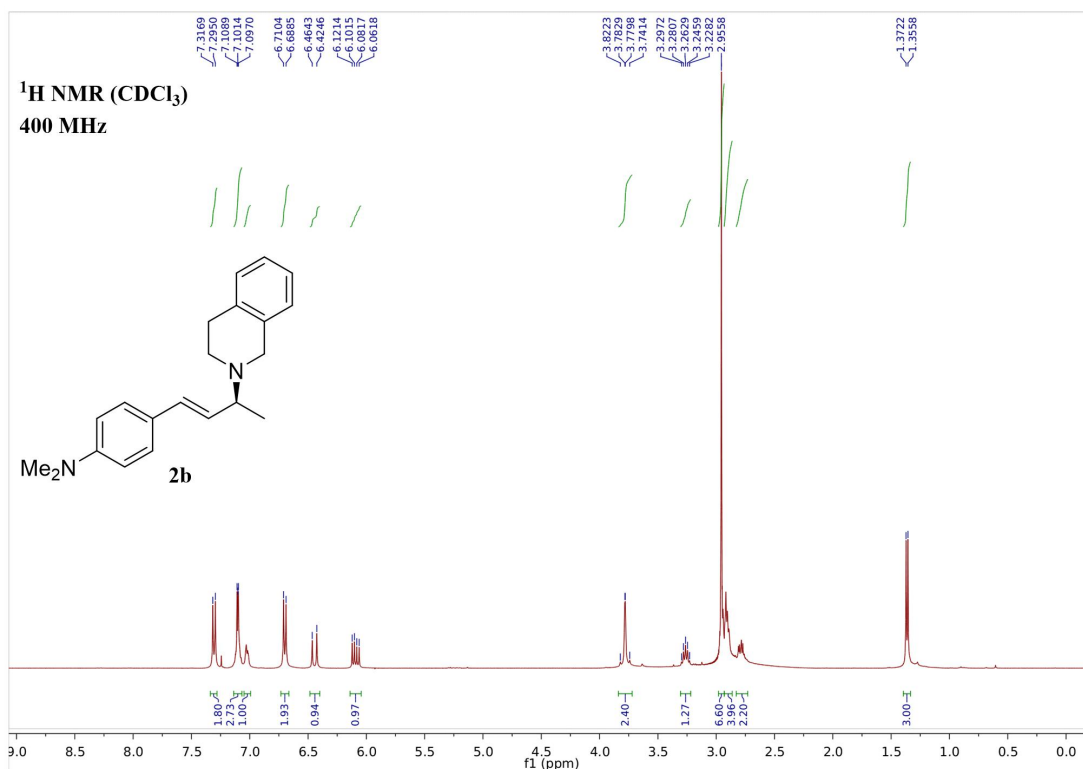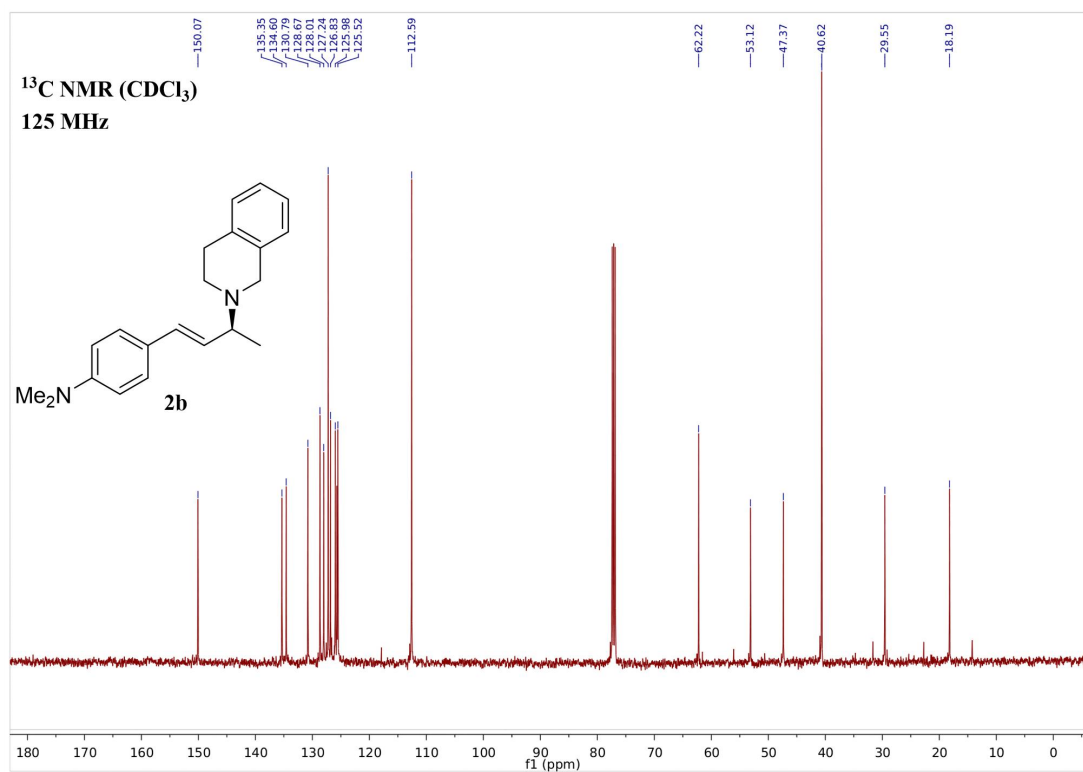

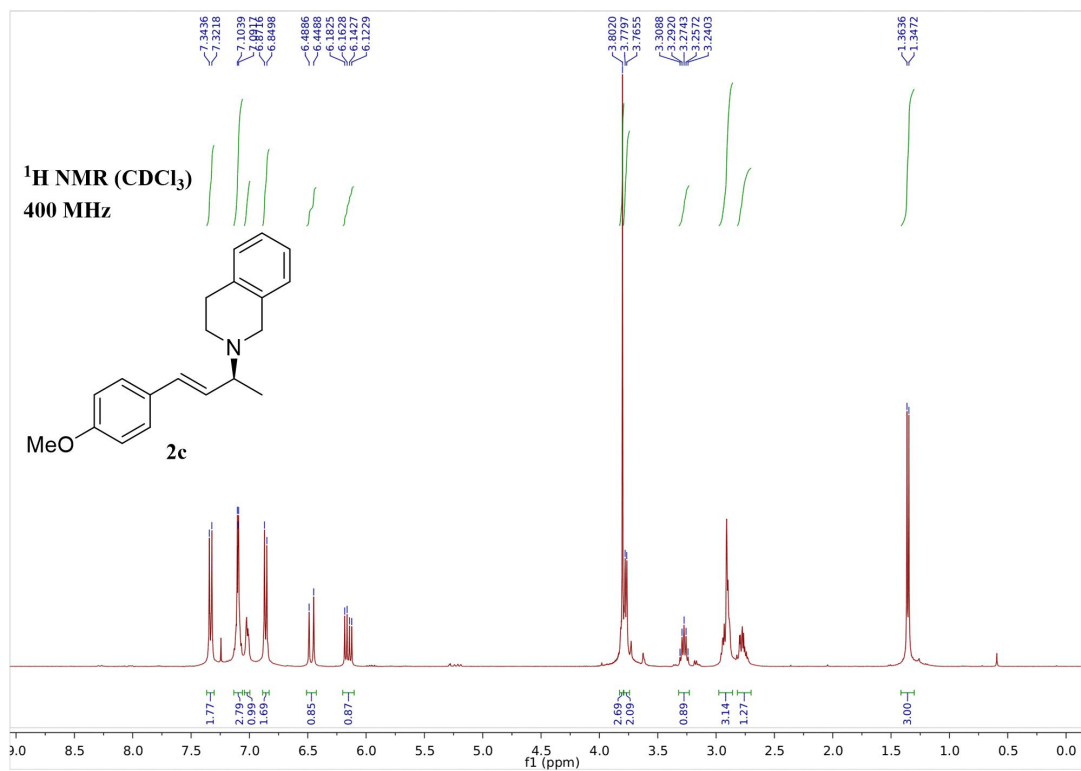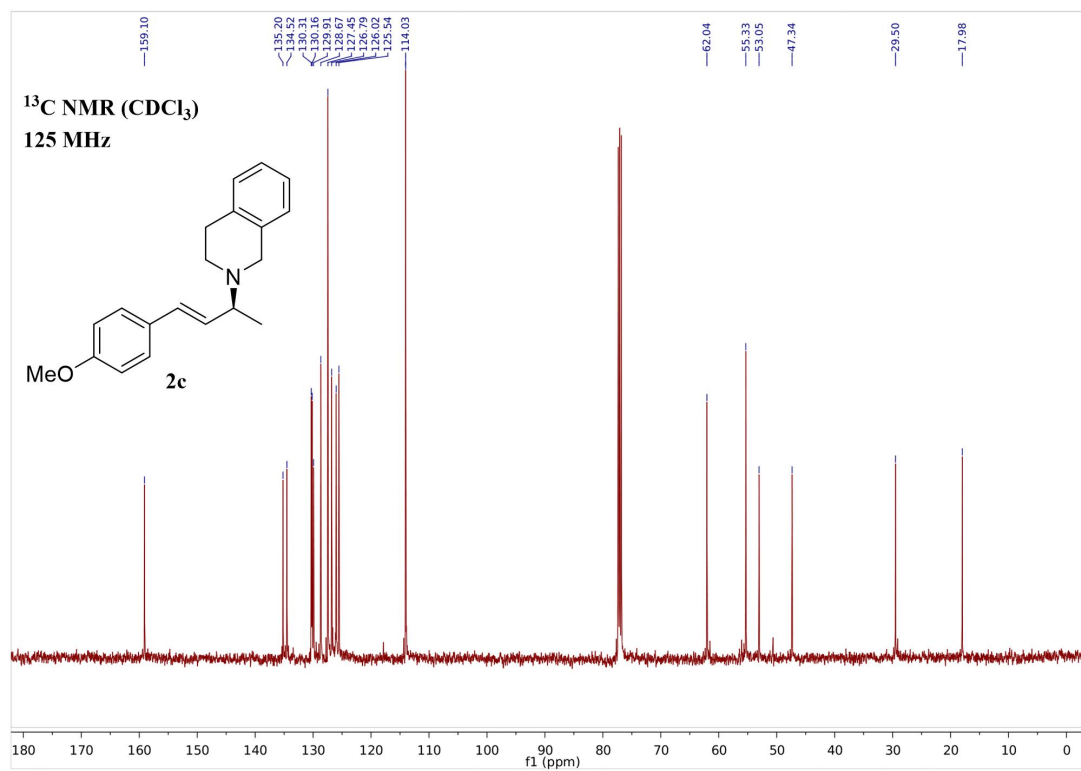

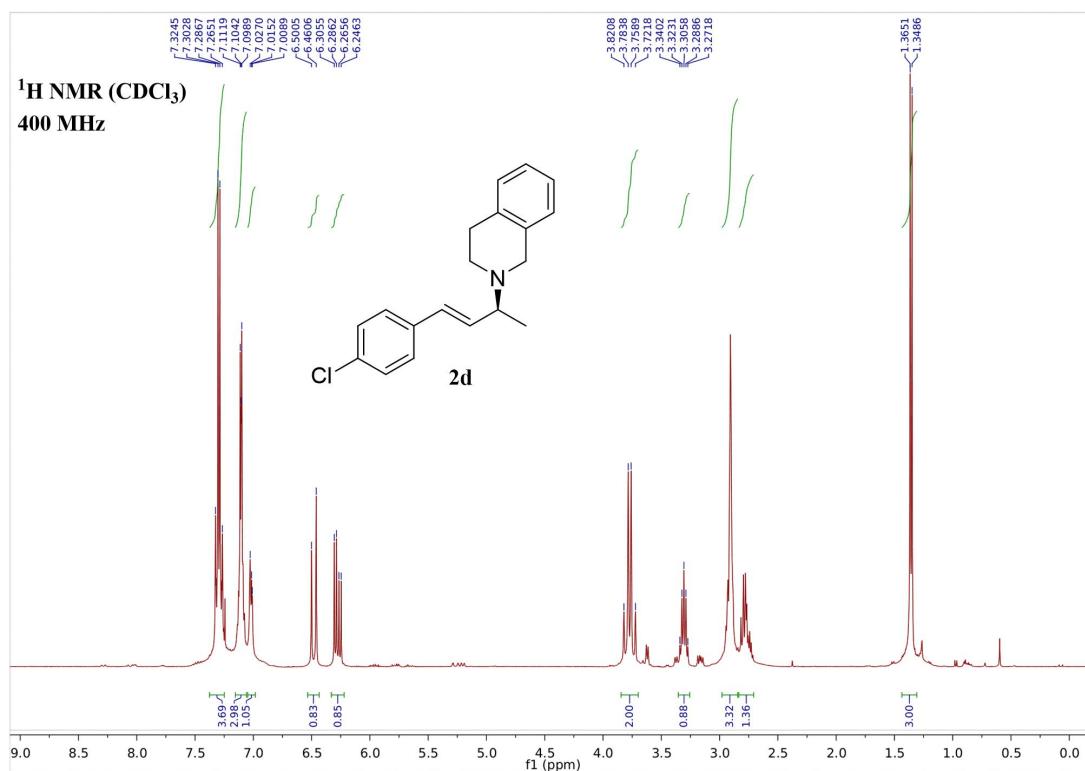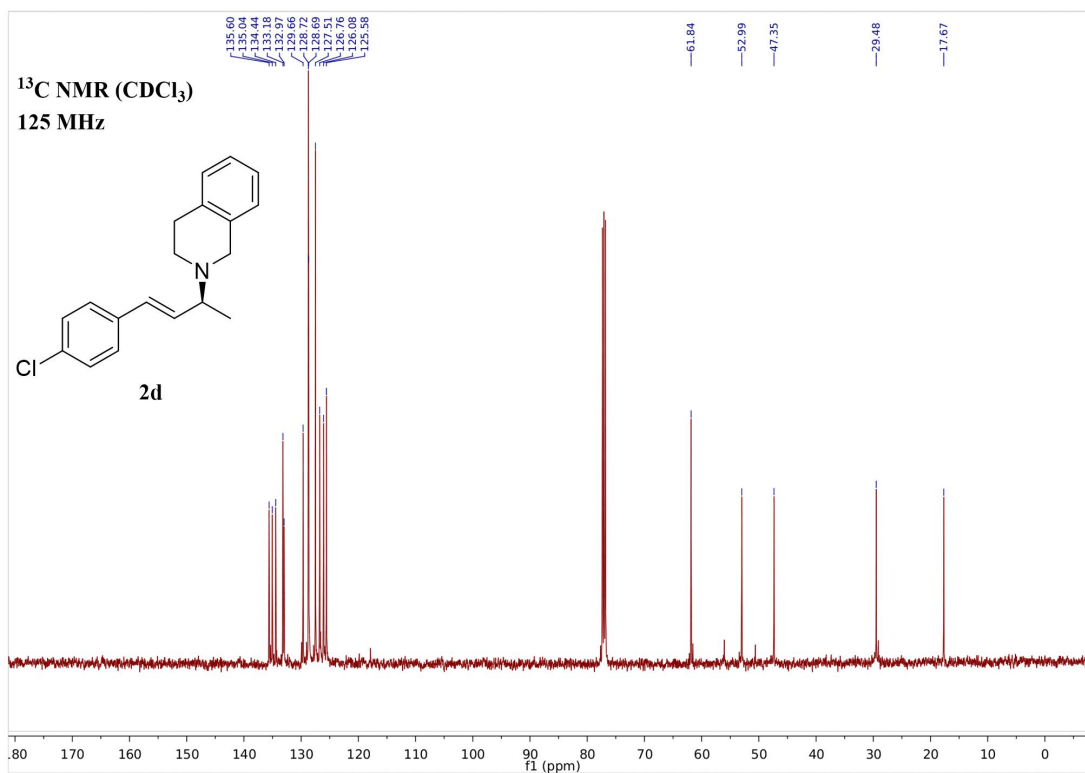



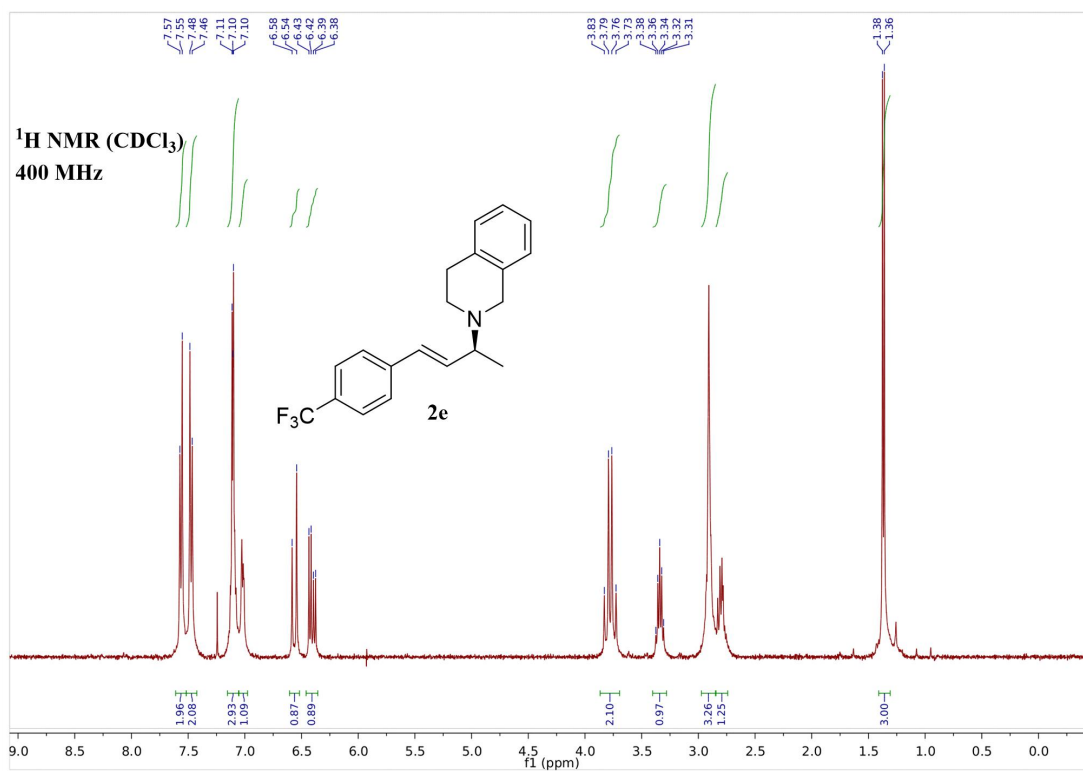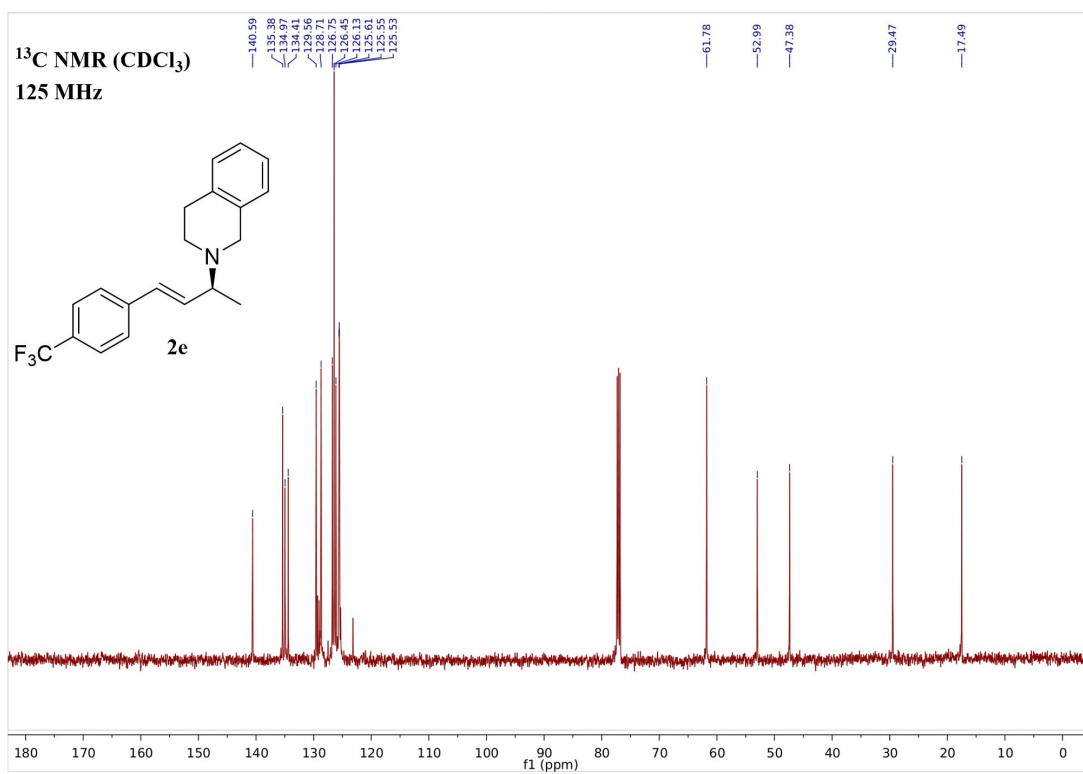

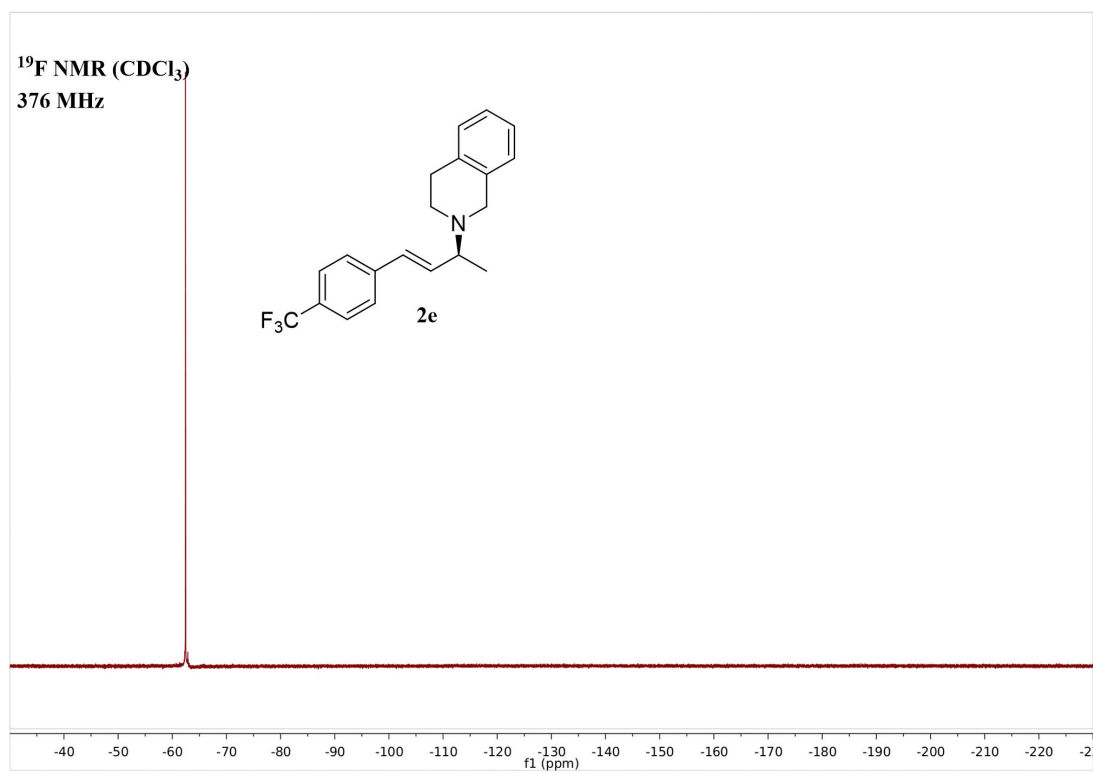

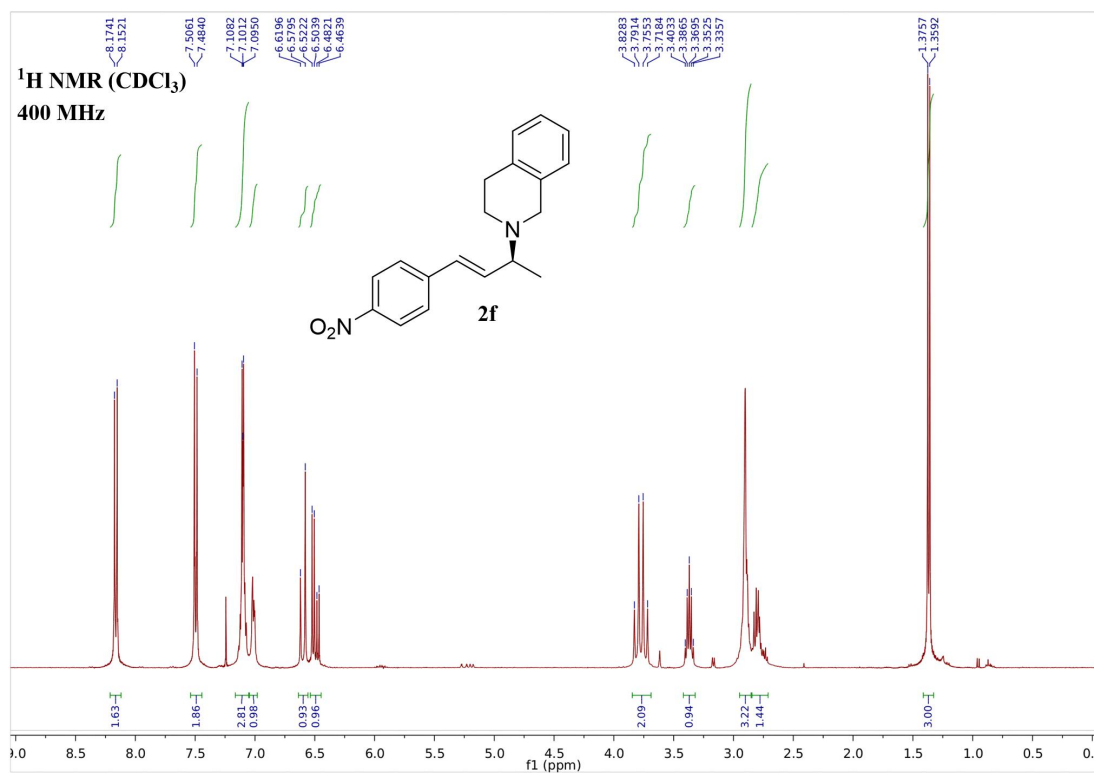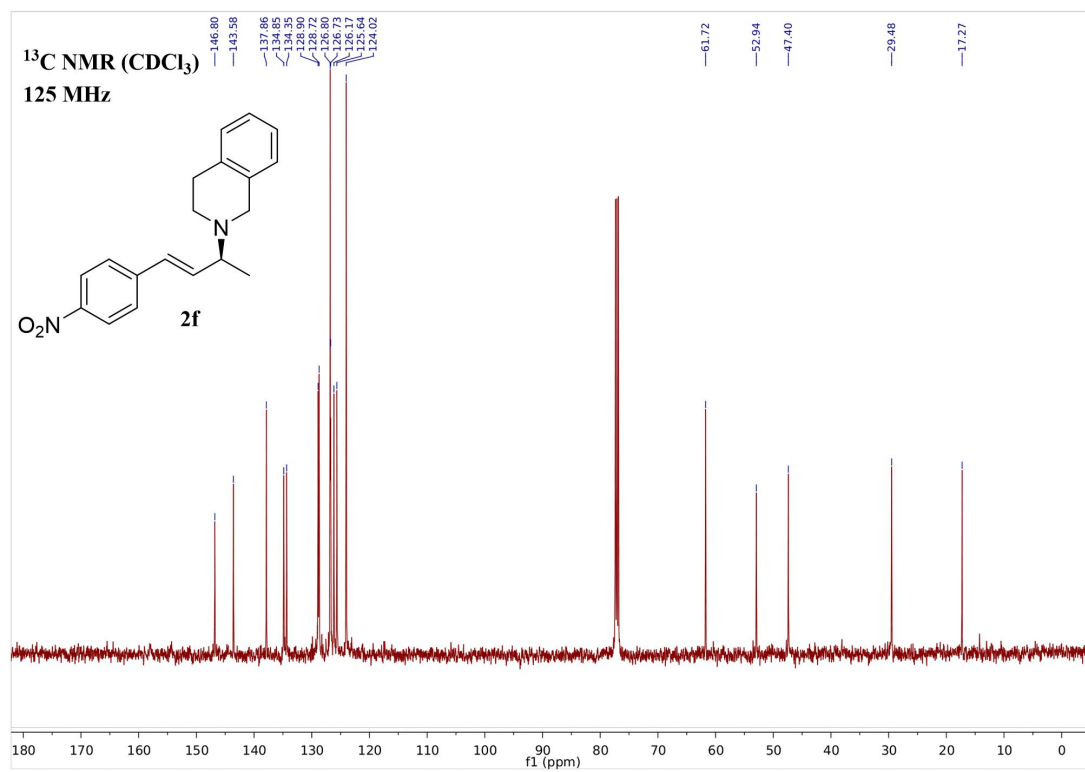

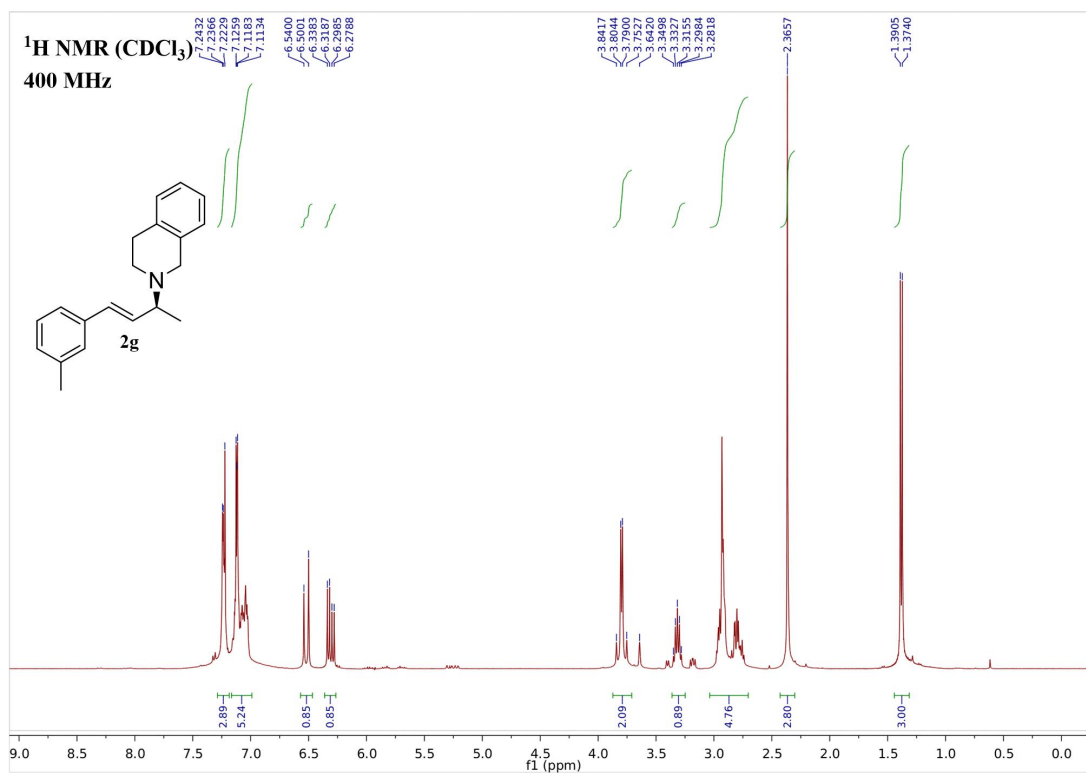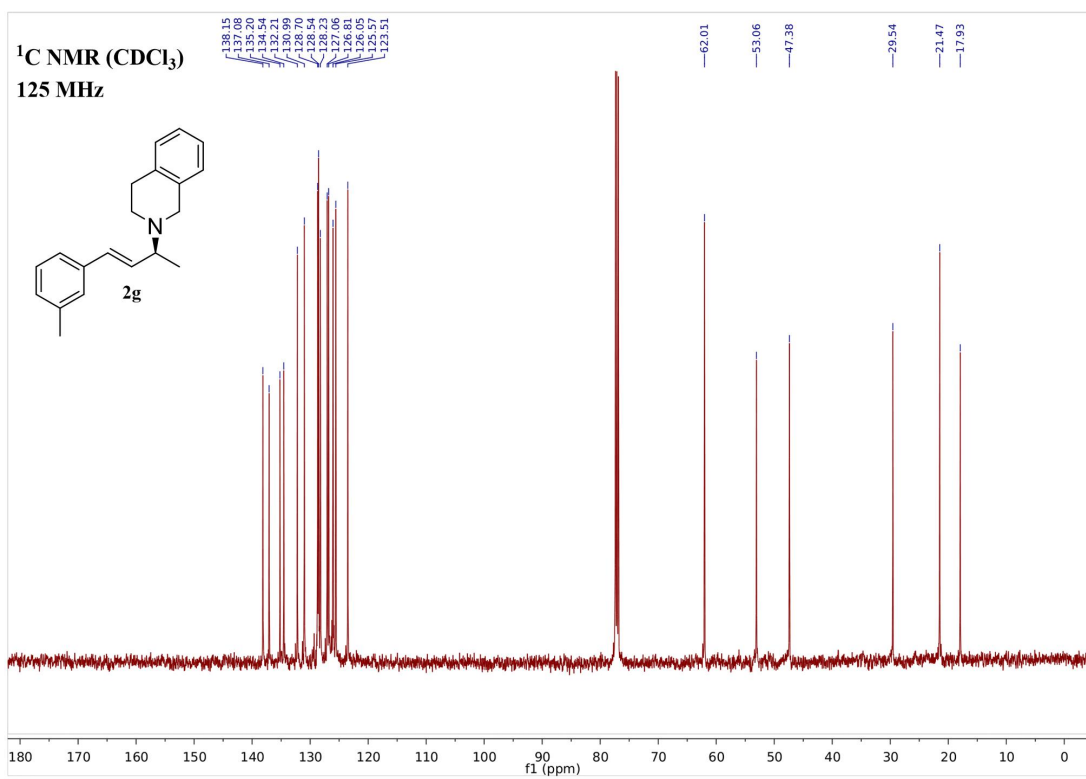

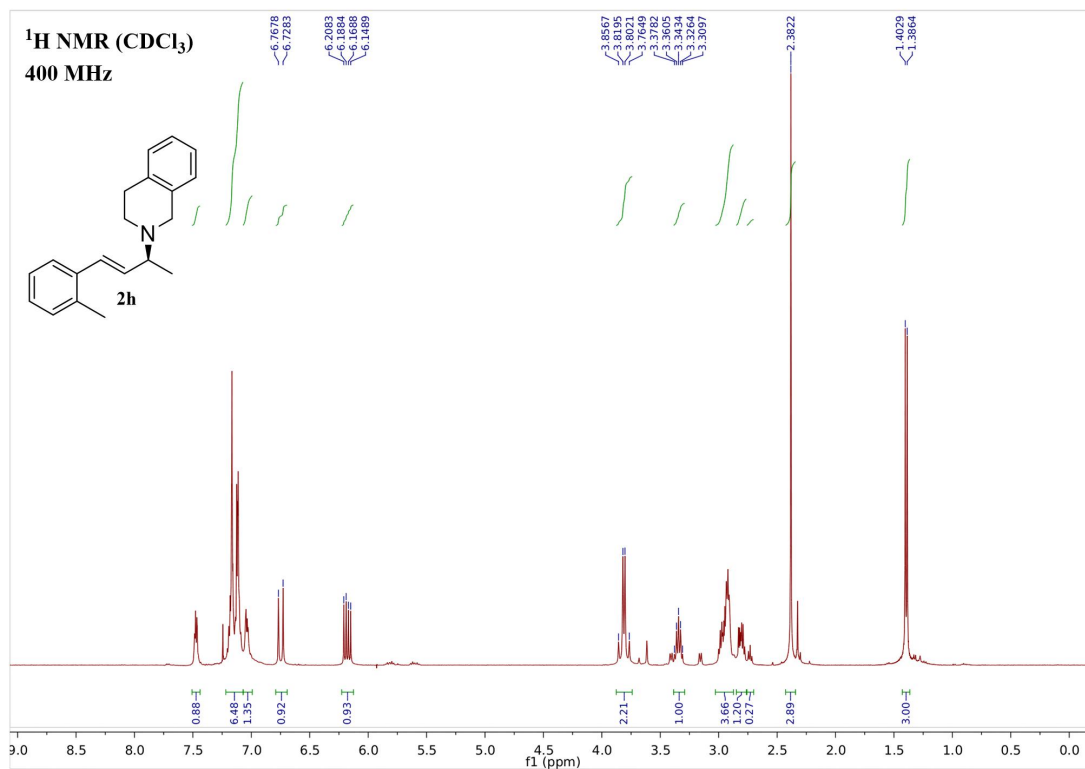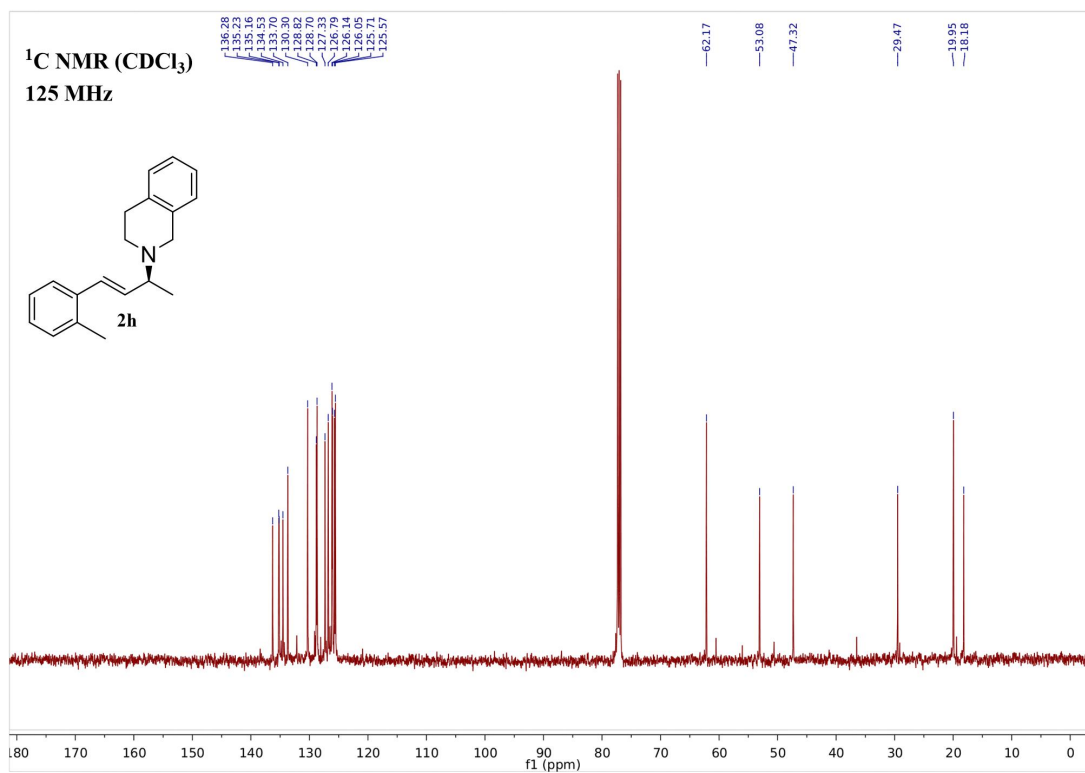

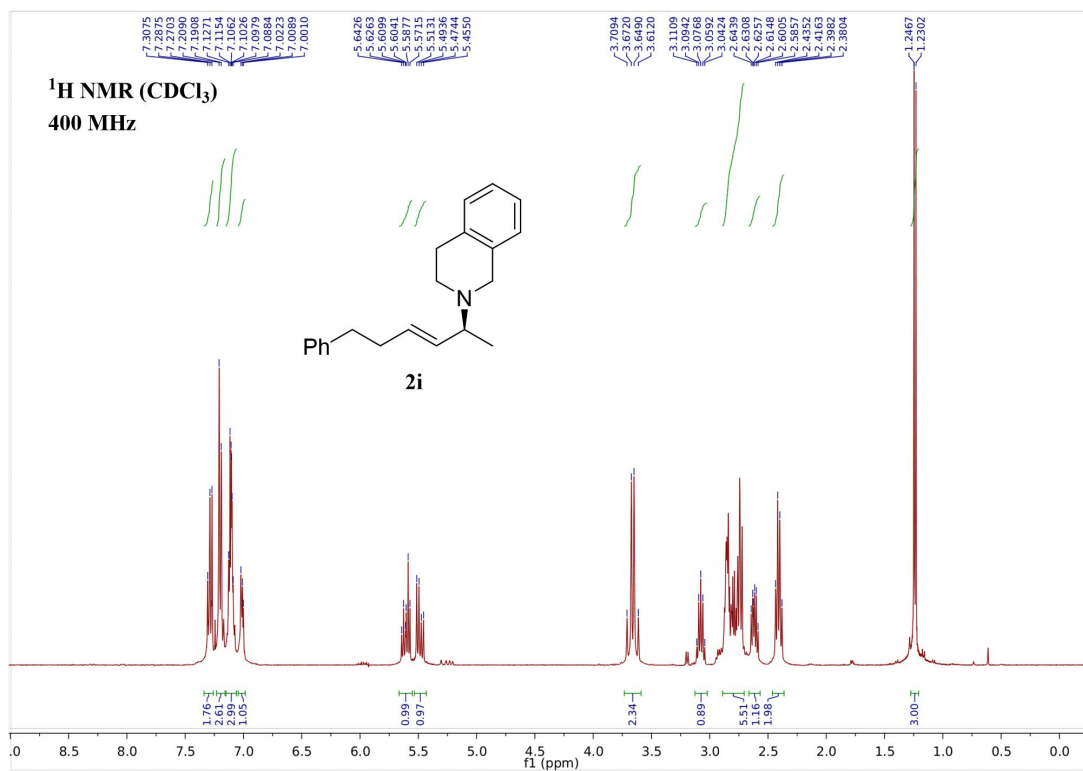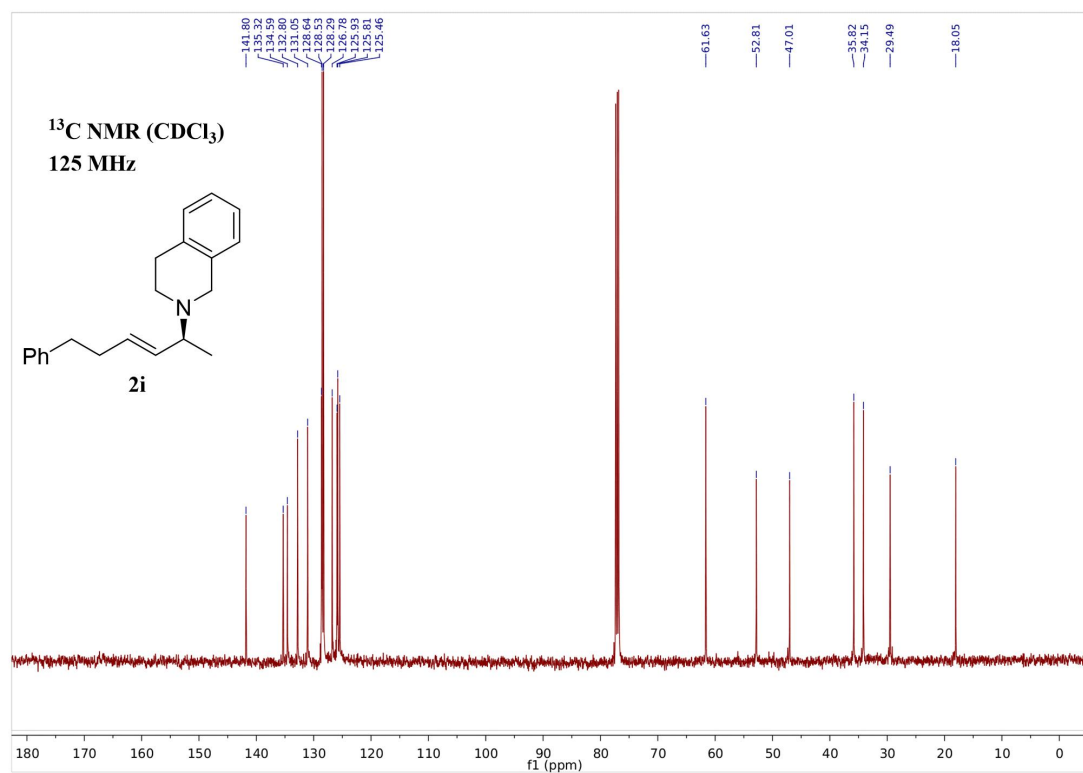

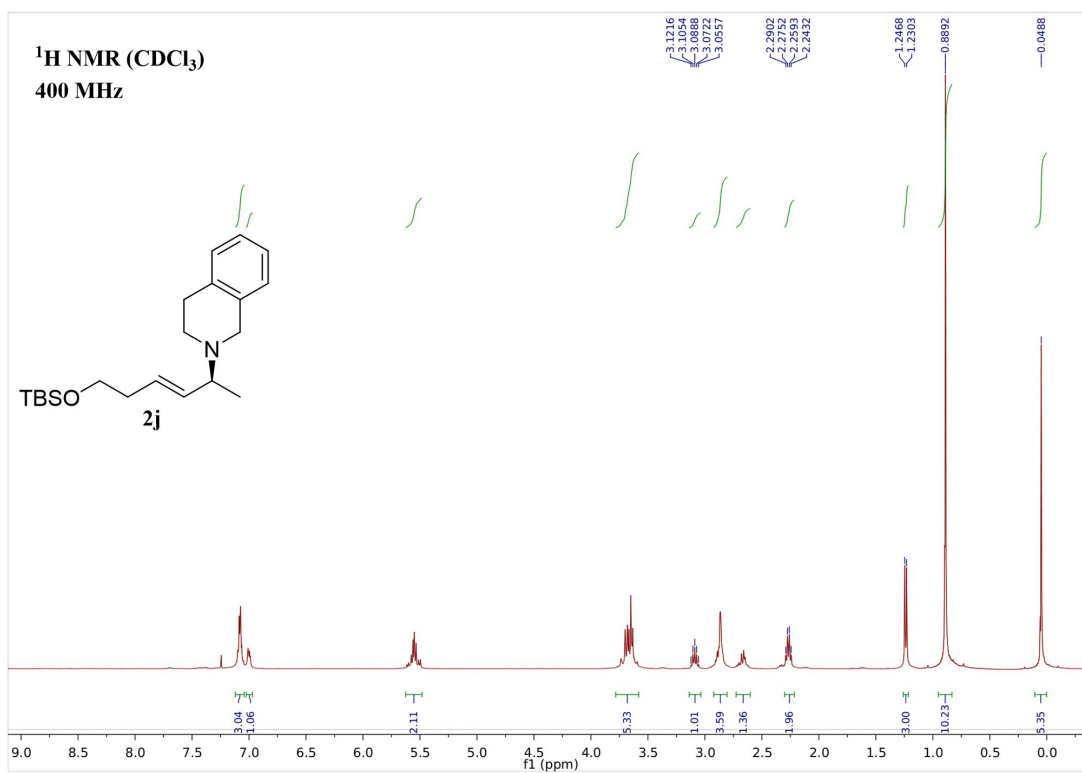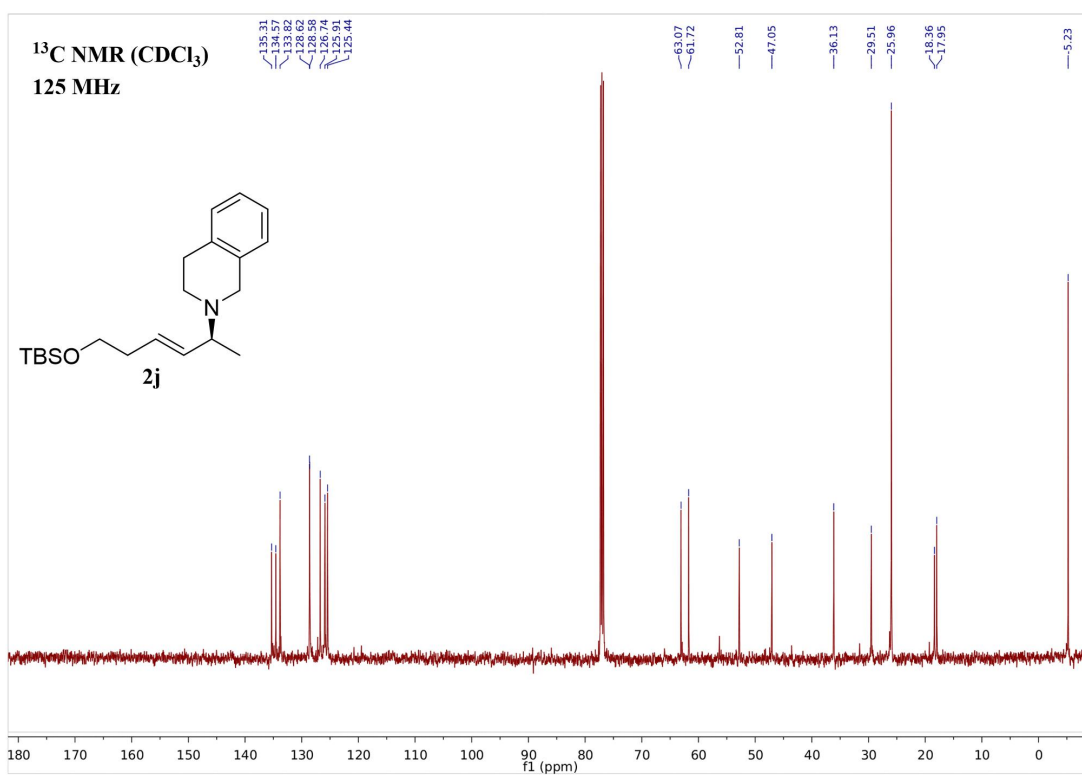

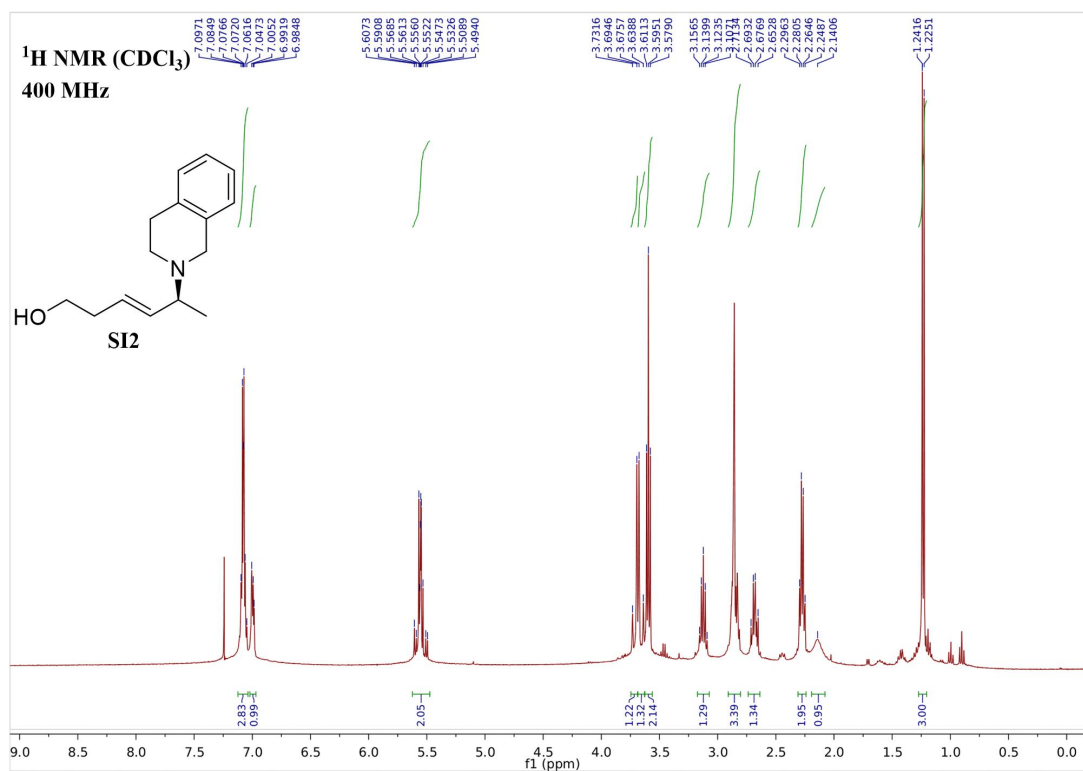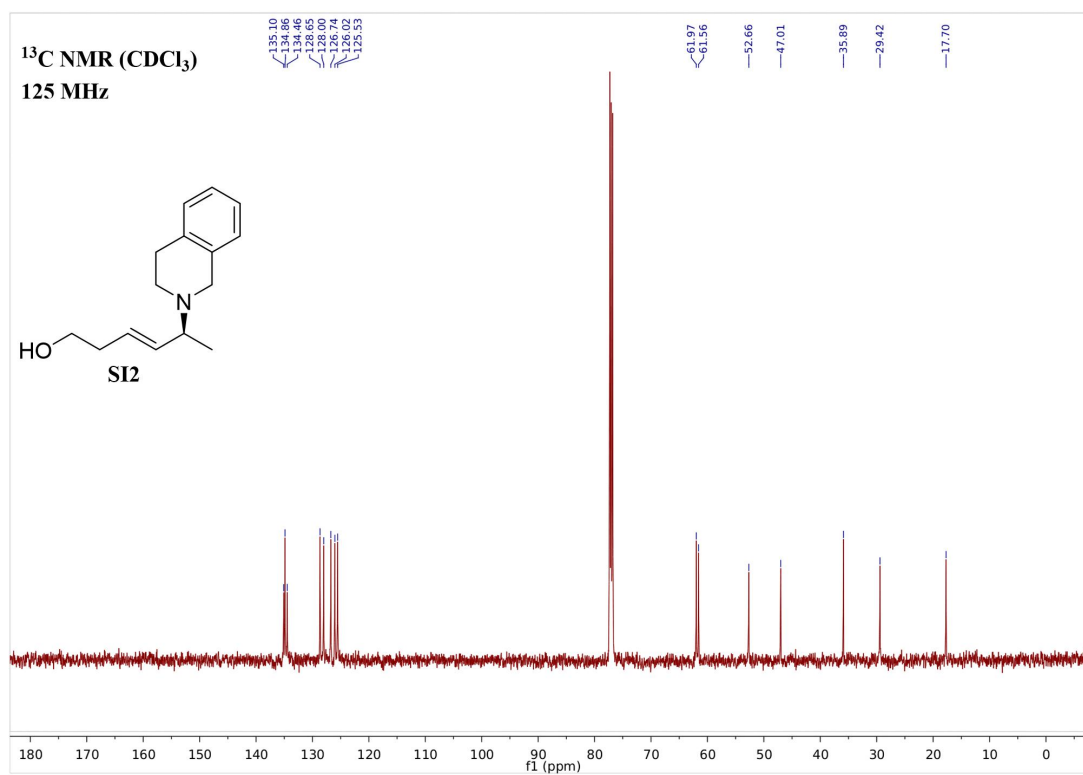



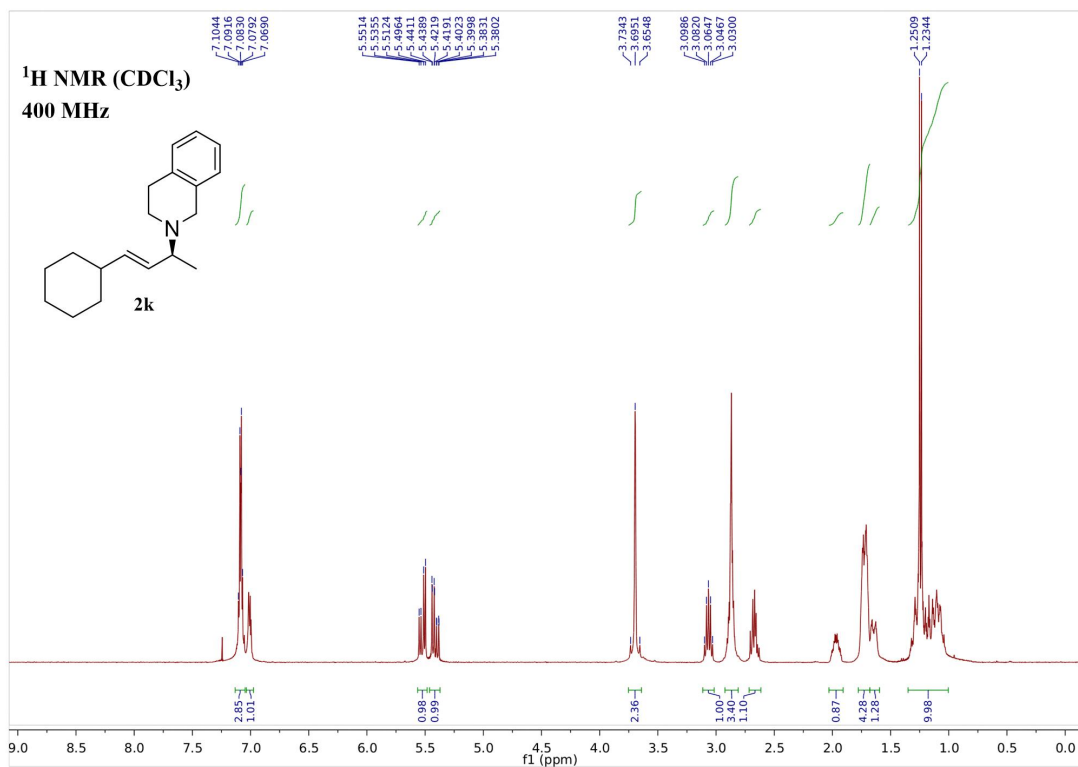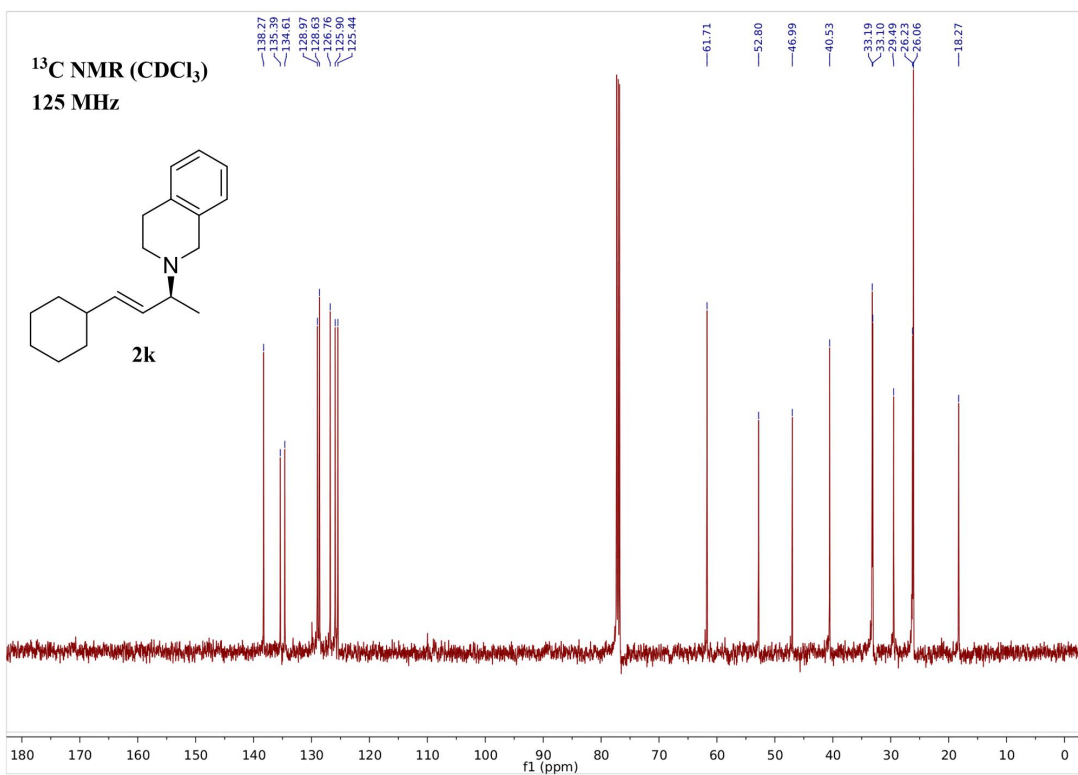

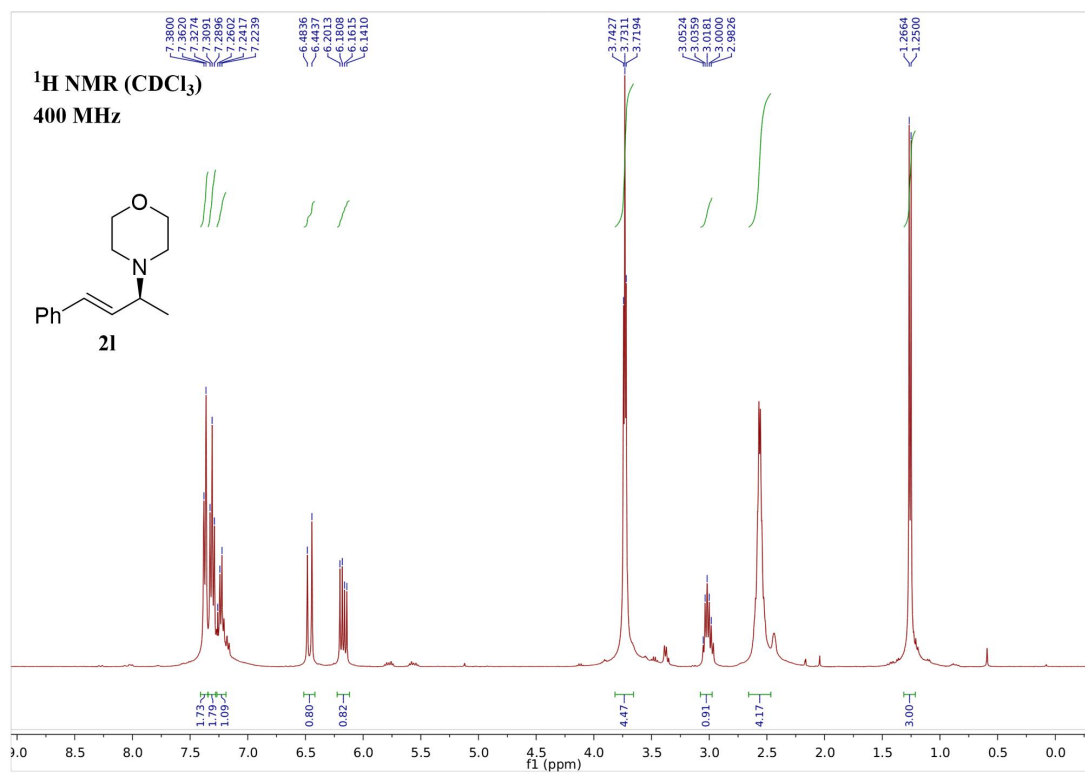

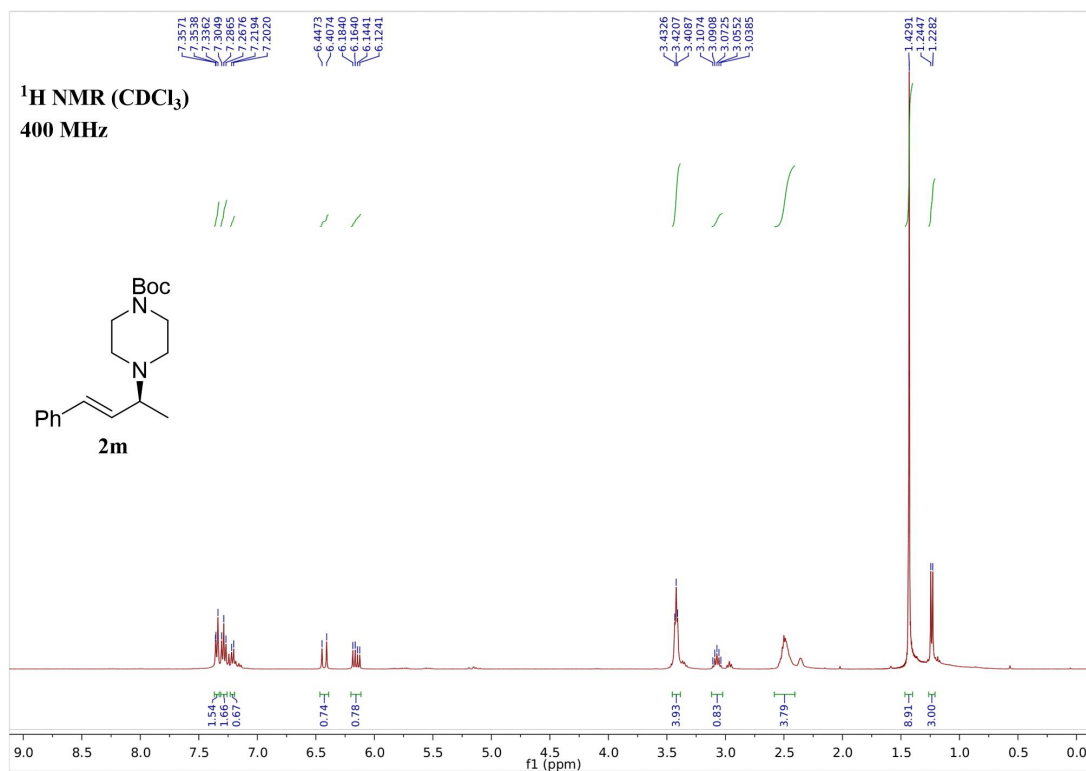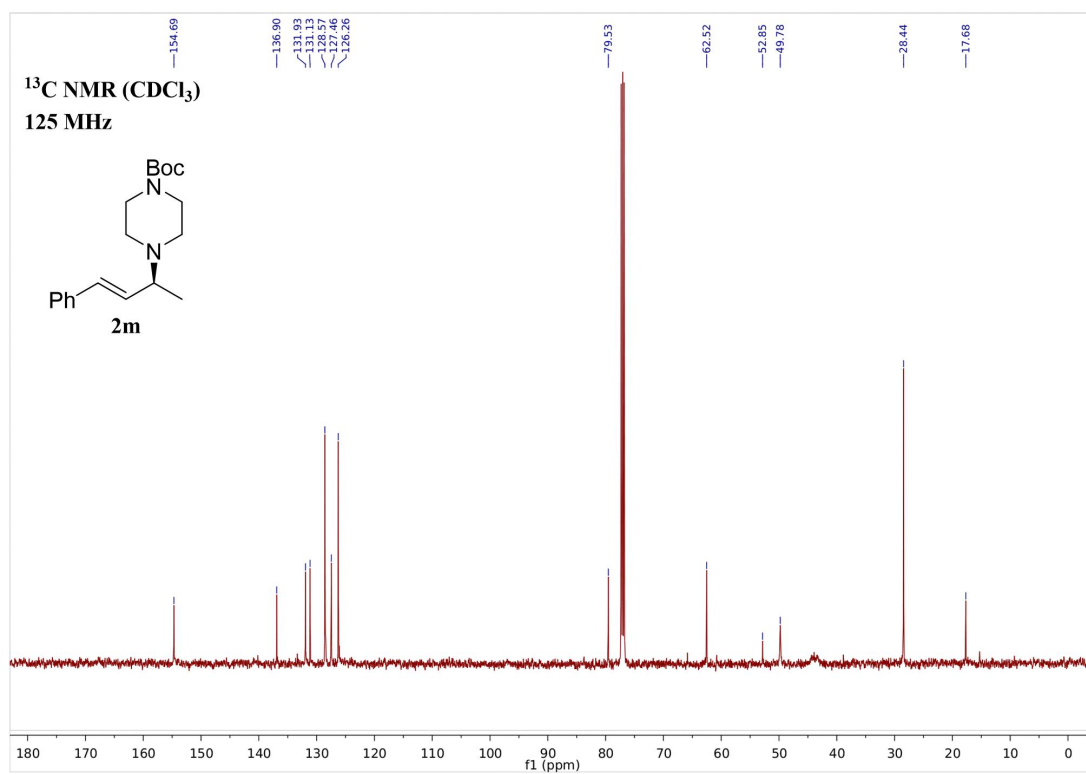

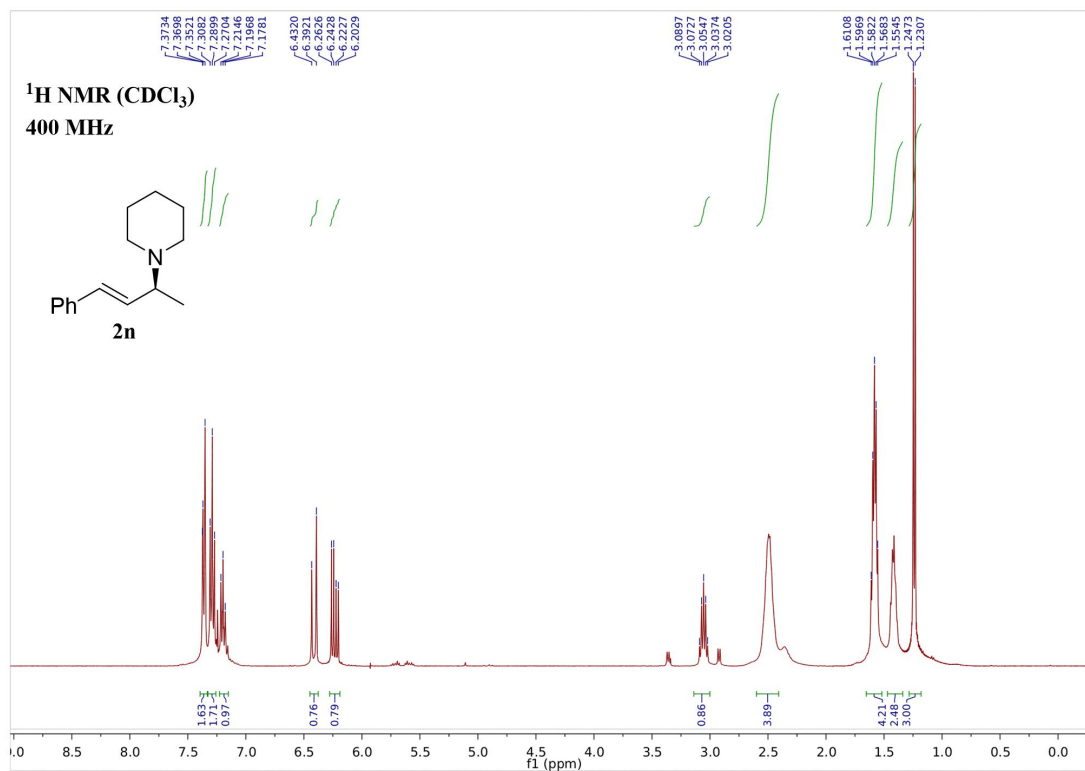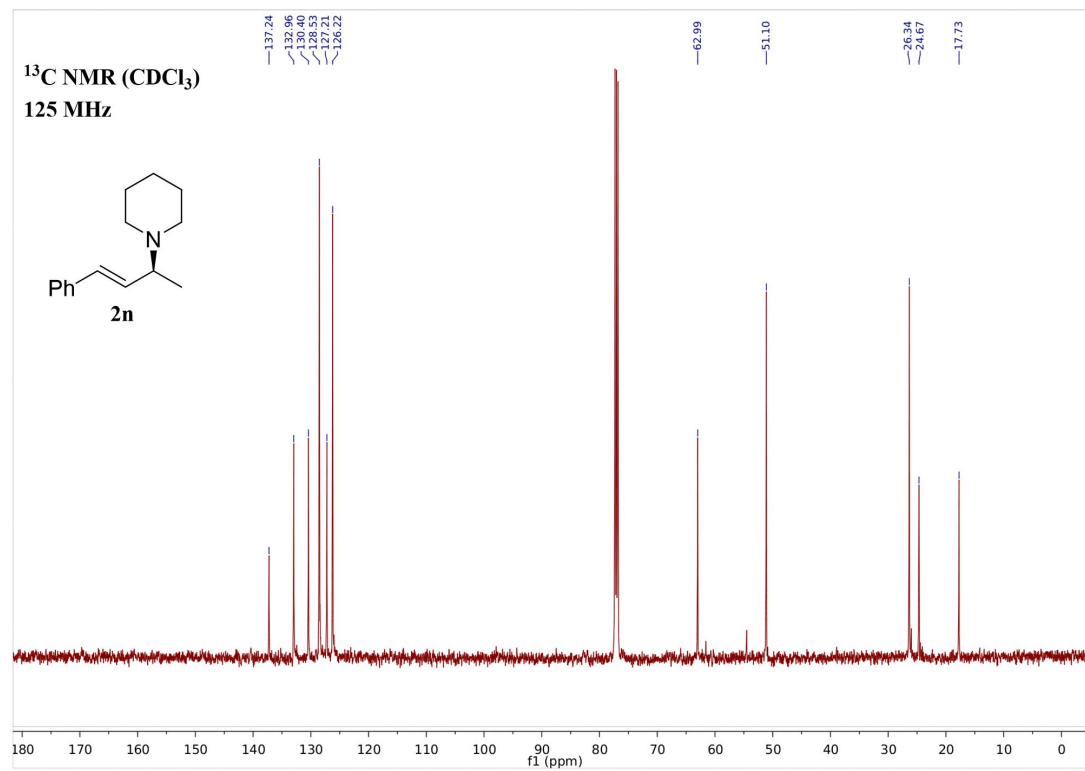

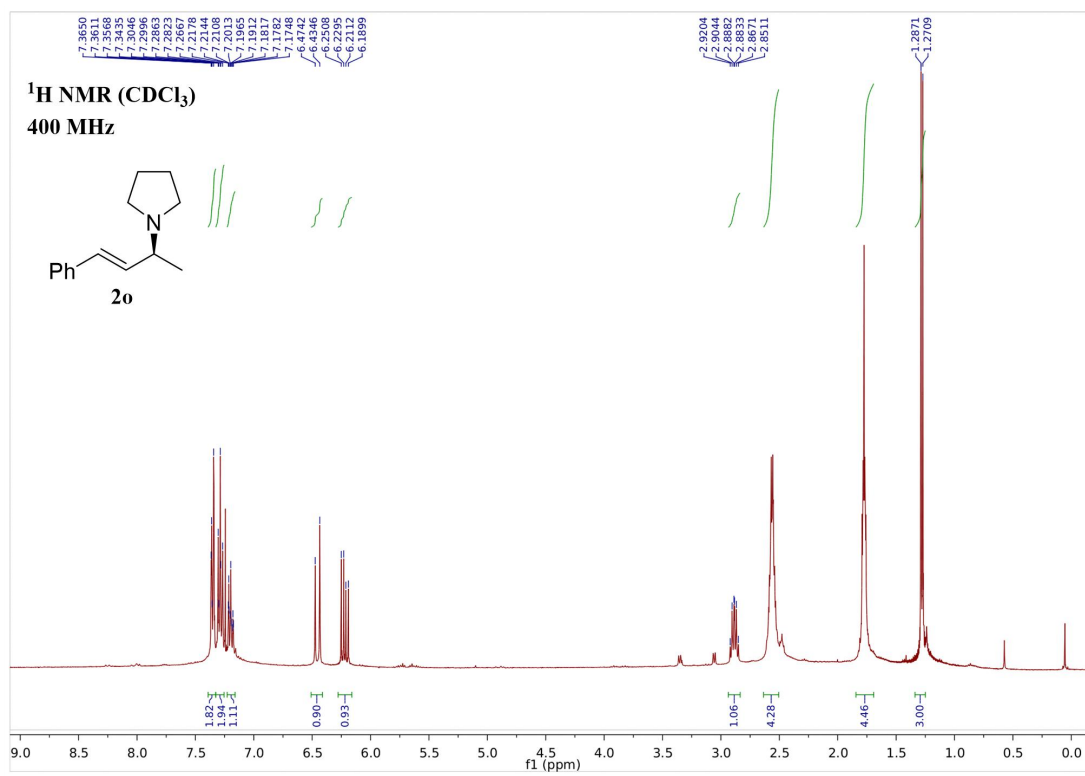

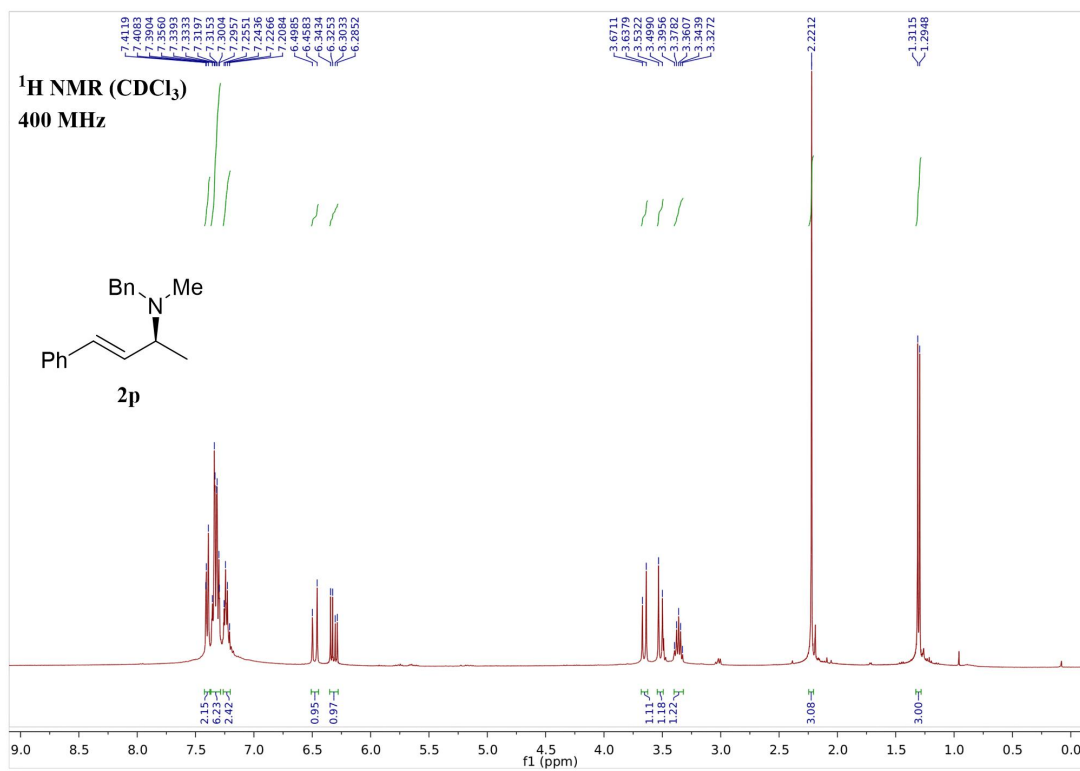

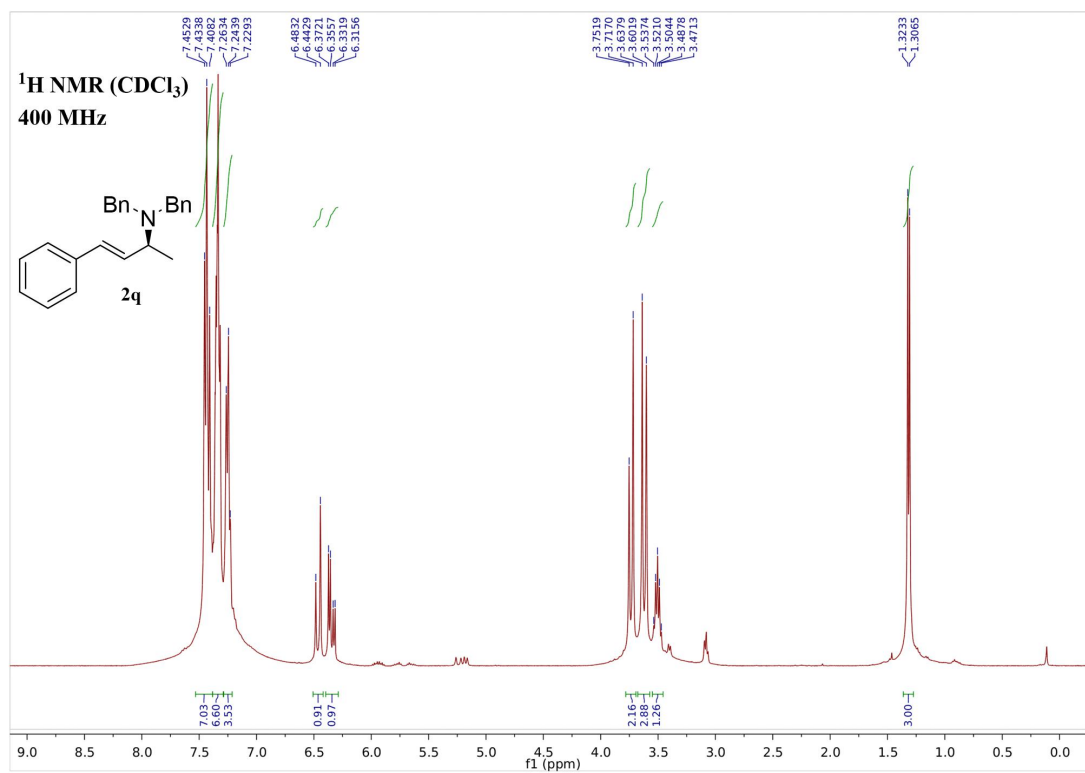

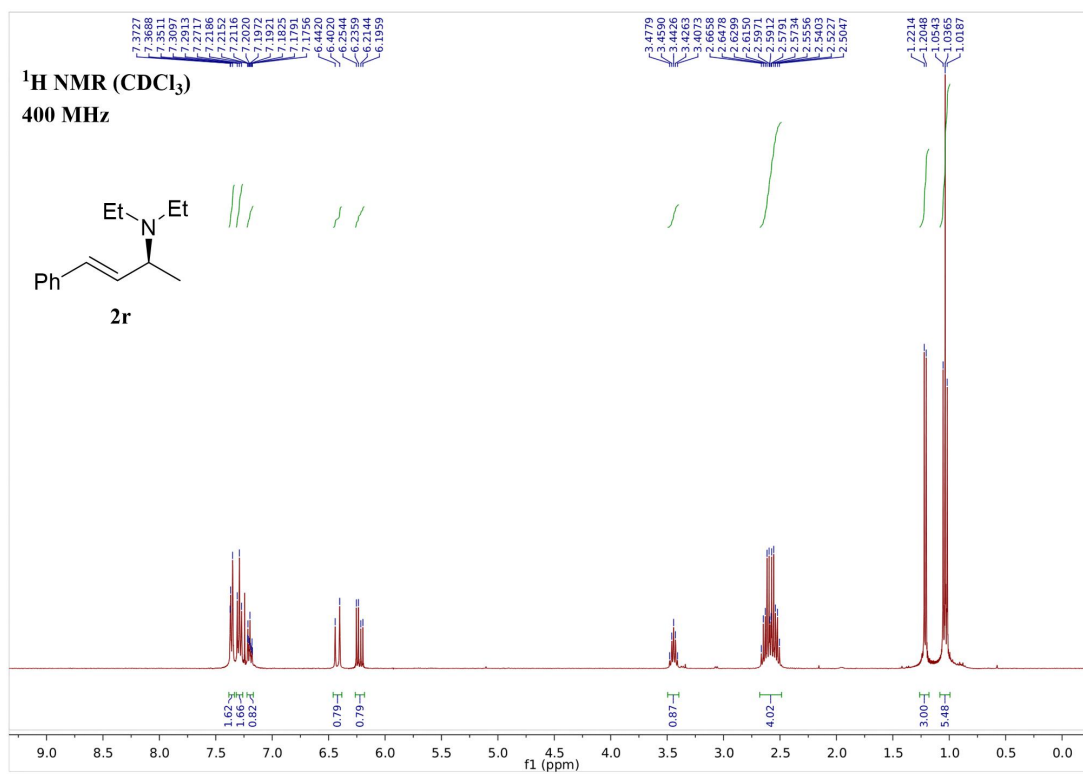



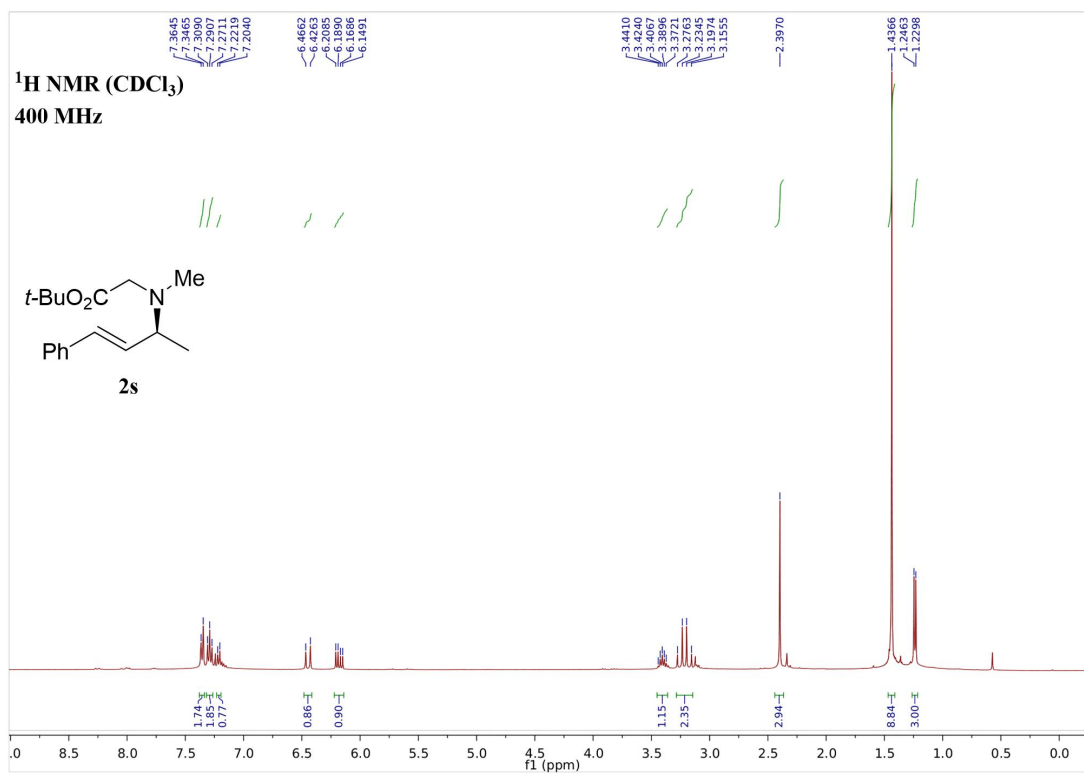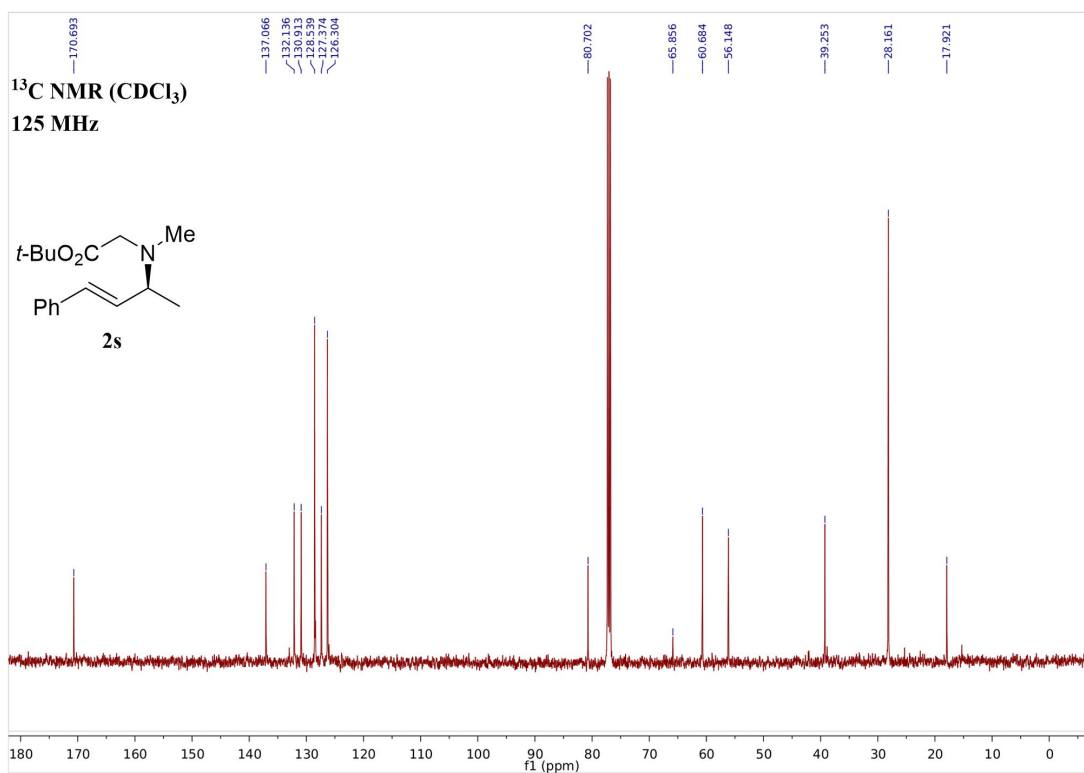

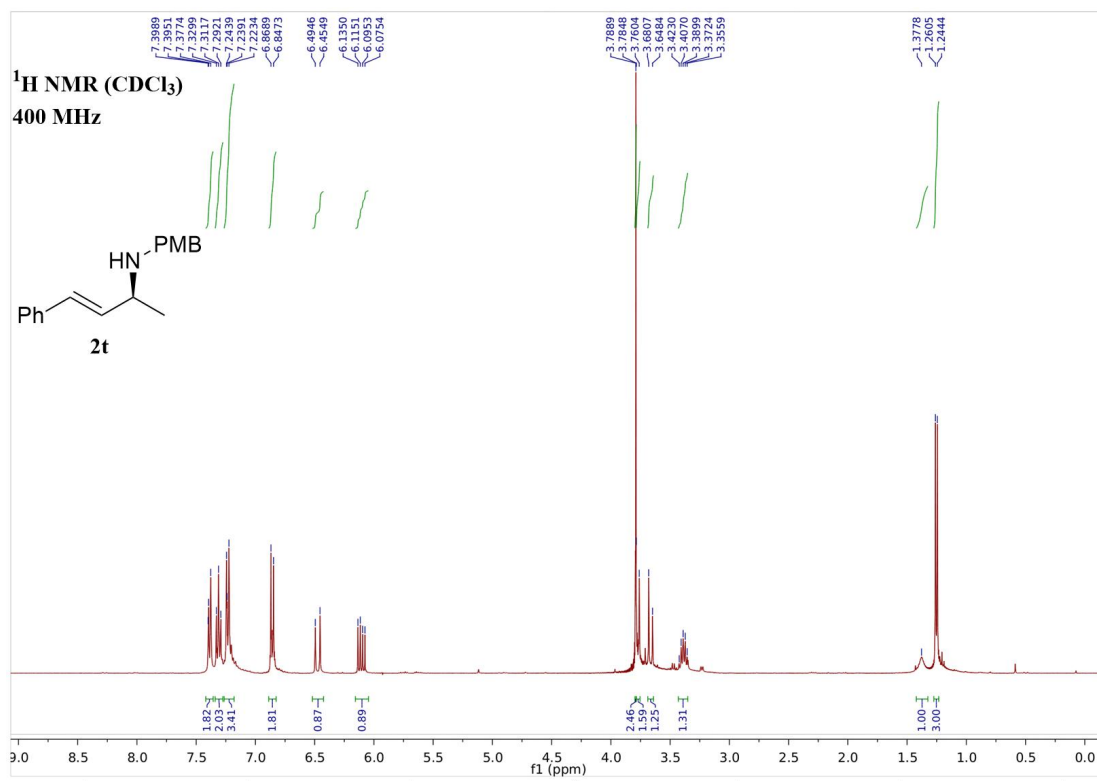

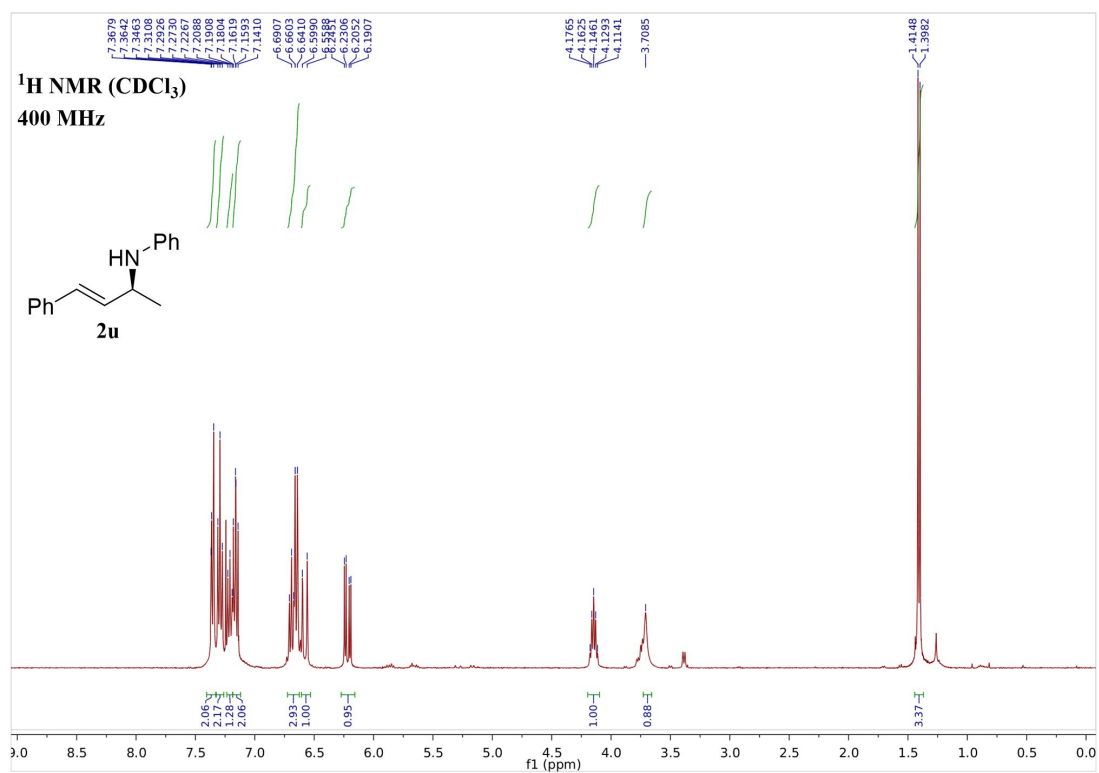

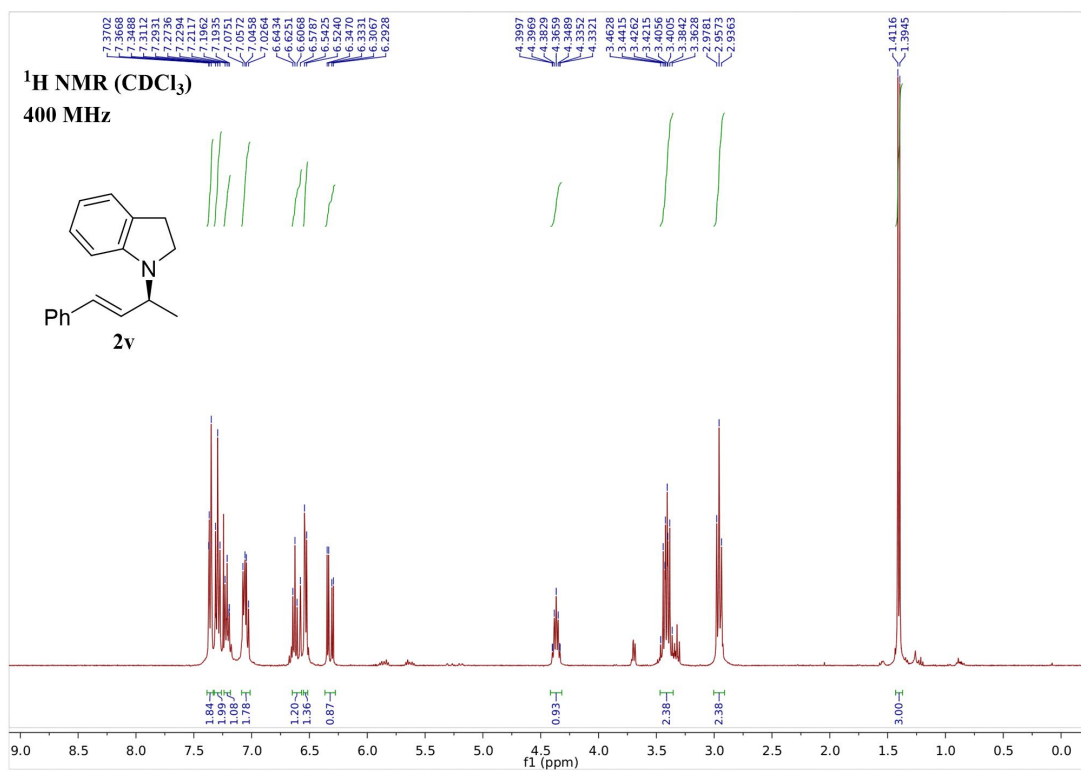

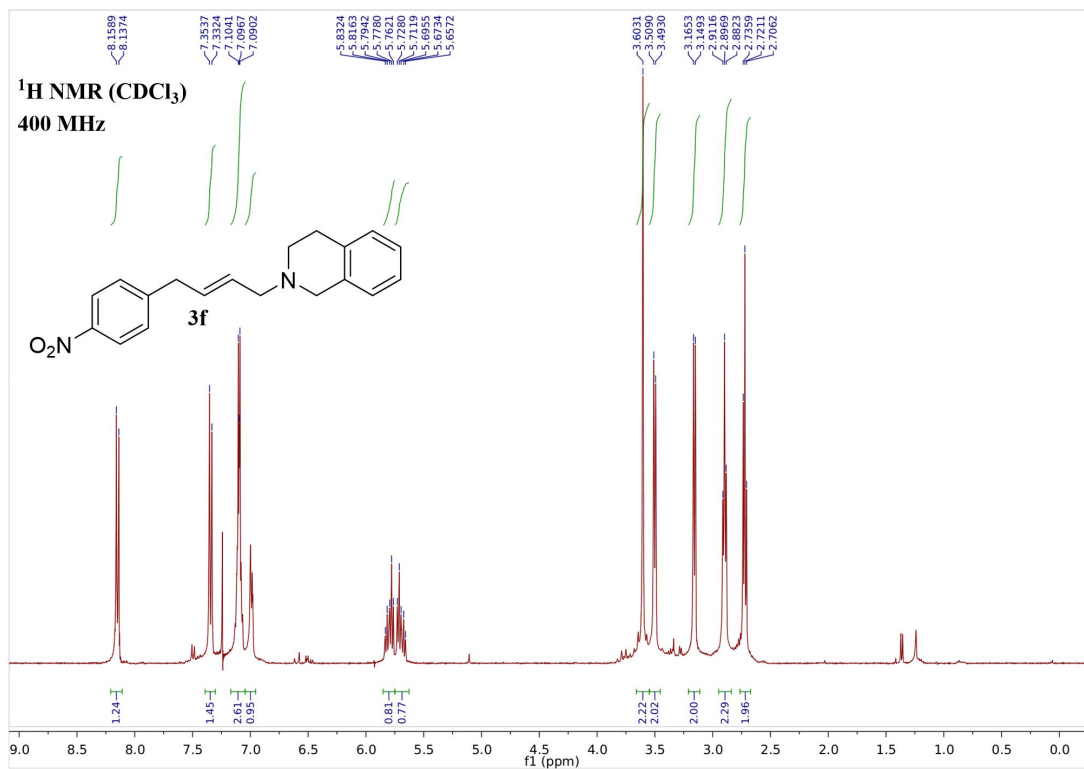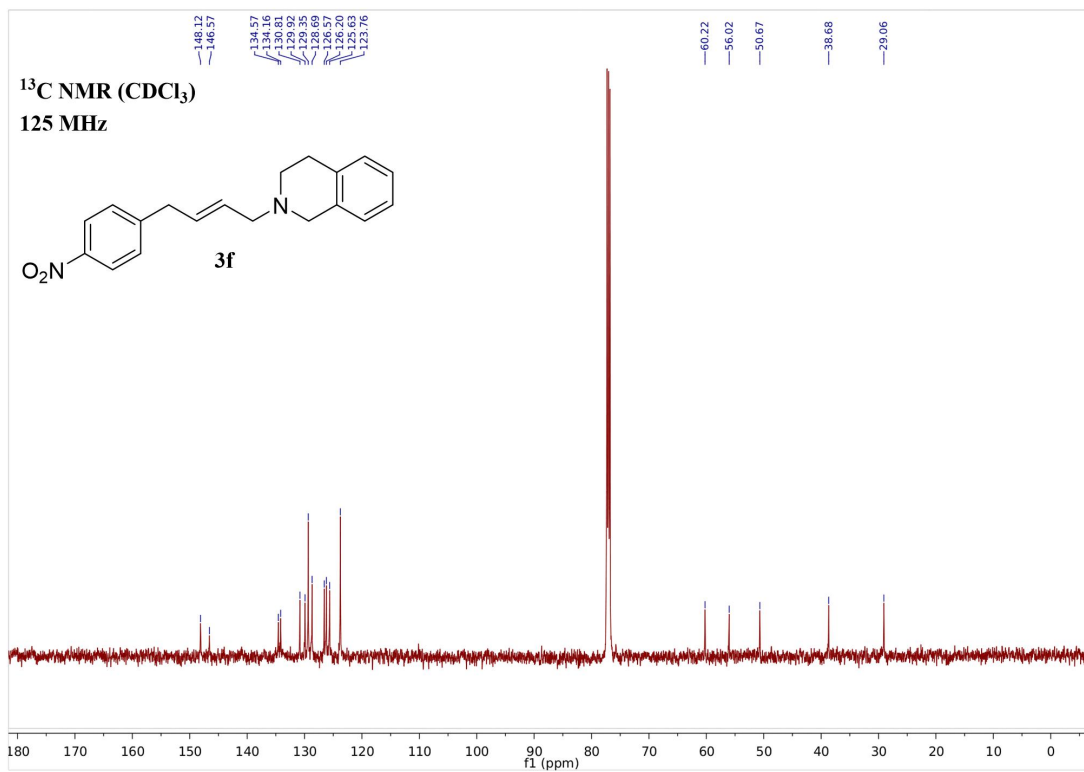

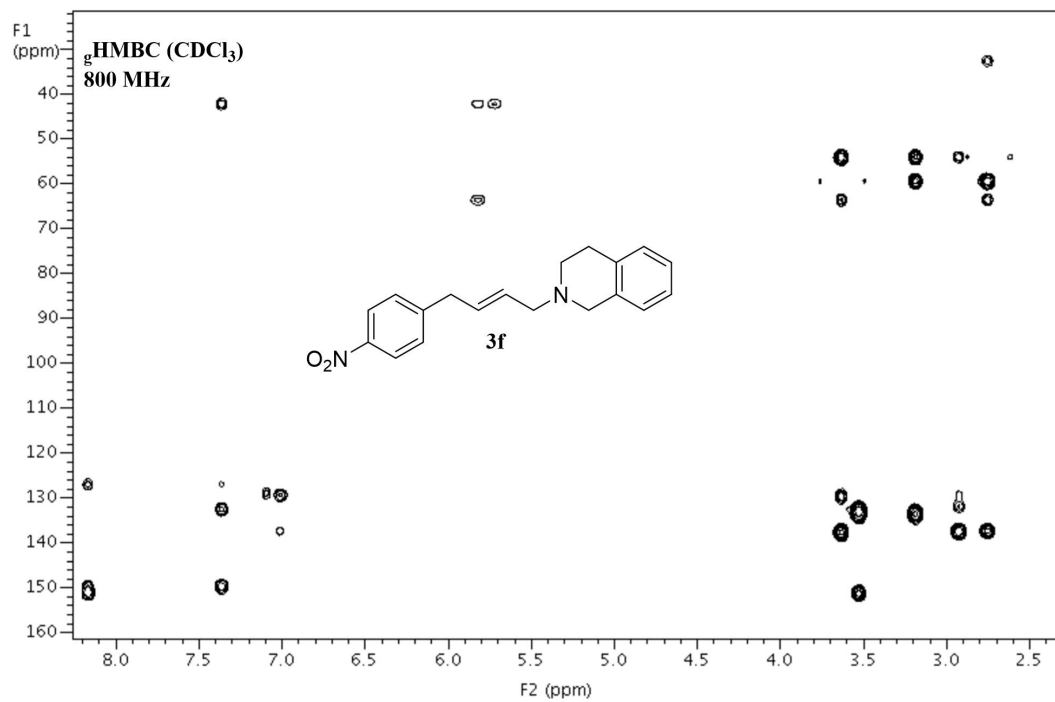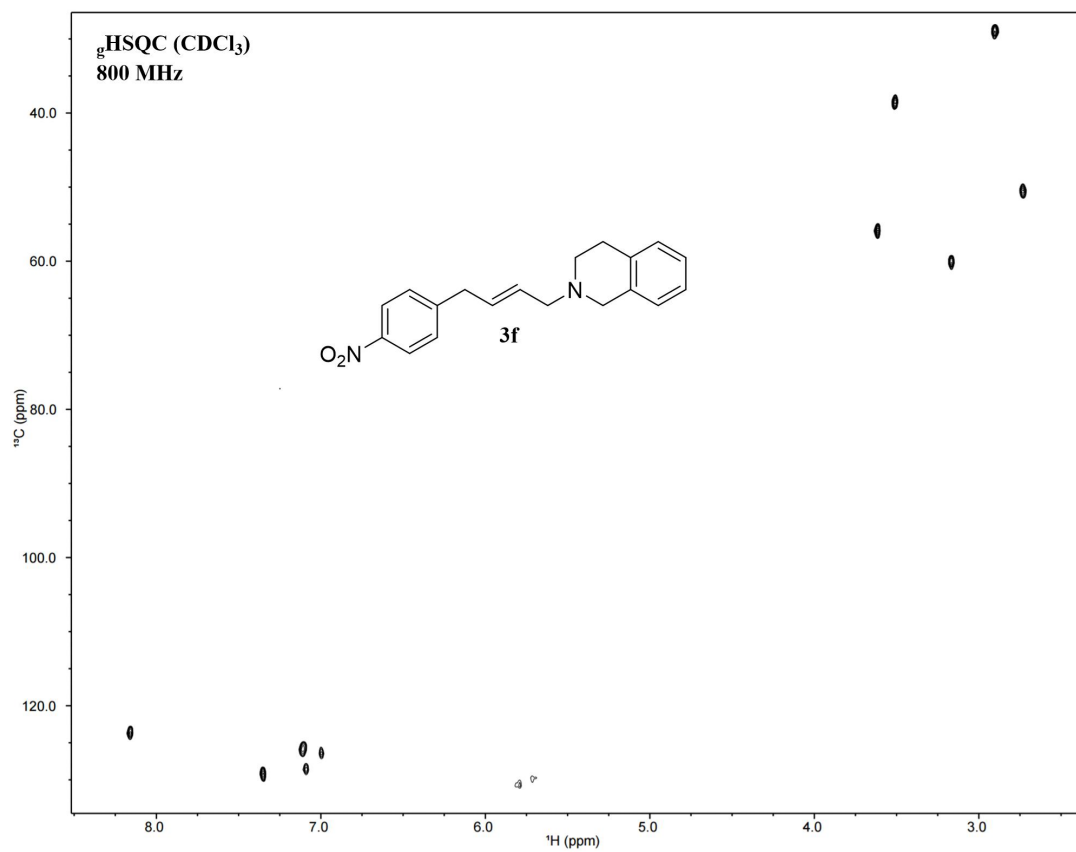

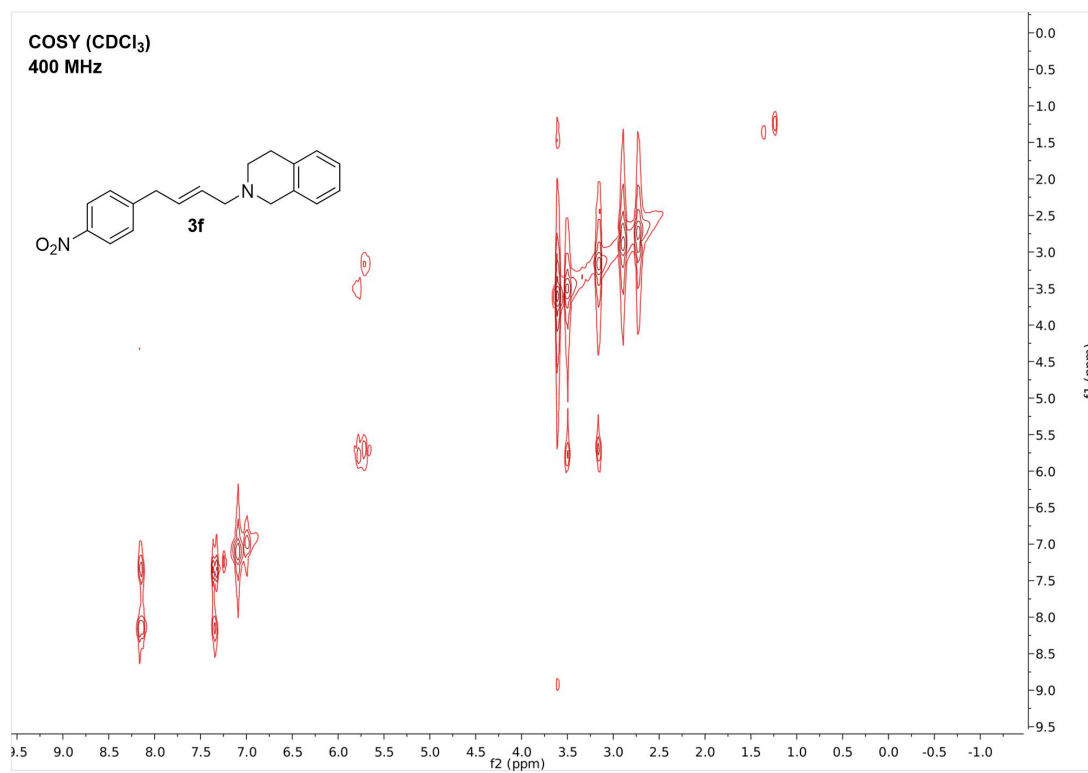

Supplement: NIHMS961439-supplement-SI_Part_B.pdf [file NIHMS961439-supplement-SI_Part_B.pdf]
